# Supplementary material for: Genome-wide association study of cardiovascular disease in testicular cancer patients treated with platinum-based chemotherapy
Source: PubMed Central journal article supplement (PMC7997802; doi:10.1038/s41397-020-00191-8), 2020-10-03
Supplement: 41397_2020_191_MOESM1_ESM.pdf [file 41397_2020_191_MOESM1_ESM.pdf]

Supplementary Table S1. Overview of the 179 SNPs that were associated at  $p \leq 0.001$  with the occurrence of any cardiovascular event during or after chemotherapy. Reference SNP cluster IDs are reported for each SNP. P is the empirical P for association using the permutation procedure. SNP: single nucleotide polymorphism.

| SNP        | <i>p</i> |
|------------|----------|
| rs12692720 | 4,00E-05 |
| rs1352436  | 4,00E-05 |
| rs983098   | 4,00E-05 |
| rs199635   | 4,00E-05 |
| rs34814294 | 4,00E-05 |
| rs3849324  | 8,00E-05 |
| rs4755718  | 8,00E-05 |
| rs7939586  | 8,00E-05 |
| rs6538046  | 8,00E-05 |
| rs1025206  | 8,00E-05 |
| rs16970618 | 8,00E-05 |
| rs11874286 | 8,00E-05 |
| rs6687976  | 0,00012  |
| rs7744306  | 0,00012  |
| rs10950657 | 0,00012  |
| rs2123269  | 0,00012  |
| rs10768008 | 0,00012  |
| rs10932020 | 0,00016  |
| rs4466027  | 0,00016  |
| rs9459964  | 0,00016  |
| rs6988639  | 0,00016  |
| rs12439991 | 0,00016  |
| rs2331545  | 0,0002   |
| rs6813846  | 0,0002   |
| rs10461655 | 0,0002   |
| rs7748814  | 0,0002   |
| rs676740   | 0,0002   |
| rs12273774 | 0,0002   |
| rs4755689  | 0,0002   |
| rs11164896 | 0,00024  |
| rs3934720  | 0,00024  |
| rs13121254 | 0,00024  |
| rs10034996 | 0,00024  |
| rs755535   | 0,00024  |
| rs7702793  | 0,00024  |
| rs9324446  | 0,00024  |
| rs1826613  | 0,00024  |
| rs1263635  | 0,00024  |
| rs943888   | 0,00024  |
| rs1387092  | 0,00028  |
| rs4756786  | 0,00028  |
| rs4757245  | 0,00028  |
| rs11582429 | 0,00032  |
| rs4858795  | 0,00032  |

|            |         |
|------------|---------|
| rs6816525  | 0,00032 |
| rs4896501  | 0,00032 |
| rs17377955 | 0,00032 |
| rs2554728  | 0,00032 |
| rs10503759 | 0,00032 |
| rs10828065 | 0,00032 |
| rs17790008 | 0,00032 |
| rs596557   | 0,00032 |
| rs9949956  | 0,00032 |
| rs4662553  | 0,00036 |
| rs7745485  | 0,00036 |
| rs17756443 | 0,00036 |
| rs12920637 | 0,00036 |
| rs5931289  | 0,00036 |
| rs2215375  | 0,0004  |
| rs4432837  | 0,0004  |
| rs11772261 | 0,0004  |
| rs13243936 | 0,0004  |
| rs6467607  | 0,0004  |
| rs7101204  | 0,0004  |
| rs7929359  | 0,0004  |
| rs10902531 | 0,0004  |
| rs6692     | 0,0004  |
| rs1555145  | 0,0004  |
| rs4676617  | 0,00044 |
| rs11736162 | 0,00044 |
| rs2130392  | 0,00044 |
| rs9459963  | 0,00044 |
| rs2040664  | 0,00044 |
| rs6462780  | 0,00044 |
| rs11025878 | 0,00044 |
| rs11066610 | 0,00044 |
| rs11066638 | 0,00044 |
| rs2027469  | 0,00048 |
| rs11800877 | 0,00048 |
| rs2275696  | 0,00048 |
| rs3866223  | 0,00048 |
| rs1366906  | 0,00048 |
| rs12688573 | 0,00048 |
| rs12198618 | 0,00052 |
| rs4237648  | 0,00052 |
| rs11643432 | 0,00052 |
| rs28890299 | 0,00052 |
| rs2070584  | 0,00052 |
| rs10182928 | 0,00056 |
| rs7610664  | 0,00056 |
| rs4689203  | 0,00056 |
| rs239953   | 0,00056 |
| rs6558831  | 0,00056 |
| rs10822863 | 0,00056 |

|            |         |
|------------|---------|
| rs2894011  | 0,00056 |
| rs4751878  | 0,00056 |
| rs9530423  | 0,00056 |
| rs7143719  | 0,00056 |
| rs12965155 | 0,00056 |
| rs760150   | 0,00056 |
| rs2341921  | 0,00056 |
| rs758439   | 0,00056 |
| rs617459   | 0,0006  |
| rs12165104 | 0,0006  |
| rs11688528 | 0,00064 |
| rs6759648  | 0,00064 |
| rs2973419  | 0,00064 |
| rs10456118 | 0,00064 |
| rs6966799  | 0,00064 |
| rs4644637  | 0,00064 |
| rs4795934  | 0,00064 |
| rs2168951  | 0,00068 |
| rs1375547  | 0,00068 |
| rs9880546  | 0,00068 |
| rs16999330 | 0,00068 |
| rs6557678  | 0,00068 |
| rs7831168  | 0,00068 |
| rs16993897 | 0,00068 |
| rs4528743  | 0,00072 |
| rs13121492 | 0,00072 |
| rs40566    | 0,00072 |
| rs4947522  | 0,00072 |
| rs13249135 | 0,00072 |
| rs16880318 | 0,00072 |
| rs747925   | 0,00072 |
| rs16942882 | 0,00072 |
| rs17078840 | 0,00072 |
| rs12457667 | 0,00072 |
| rs3911618  | 0,00076 |
| rs9822731  | 0,00076 |
| rs7691972  | 0,00076 |
| rs7722584  | 0,00076 |
| rs3812278  | 0,00076 |
| rs10505371 | 0,00076 |
| rs6507498  | 0,00076 |
| rs6673313  | 0,0008  |
| rs6773957  | 0,0008  |
| rs4762060  | 0,0008  |
| rs10858680 | 0,0008  |
| rs11610234 | 0,0008  |
| rs8030490  | 0,0008  |
| rs4577099  | 0,0008  |
| rs1415439  | 0,00084 |
| rs7593846  | 0,00084 |

|            |         |
|------------|---------|
| rs2147866  | 0,00084 |
| rs4607409  | 0,00084 |
| rs4723679  | 0,00084 |
| rs2506145  | 0,00084 |
| rs898918   | 0,00084 |
| rs12100703 | 0,00084 |
| rs13406850 | 0,00088 |
| rs7837472  | 0,00088 |
| rs8178838  | 0,00088 |
| rs6432774  | 0,00092 |
| rs7673254  | 0,00092 |
| rs949719   | 0,00092 |
| rs745247   | 0,00092 |
| rs3003177  | 0,00092 |
| rs6934819  | 0,00092 |
| rs11136689 | 0,00092 |
| rs10764344 | 0,00092 |
| rs7916162  | 0,00092 |
| rs9555784  | 0,00092 |
| rs2236570  | 0,00096 |
| rs4521178  | 0,00096 |
| rs9864293  | 0,00096 |
| rs938025   | 0,00096 |
| rs2201369  | 0,00096 |
| rs10868152 | 0,00096 |
| rs1400438  | 0,00096 |
| rs11640395 | 0,00096 |
| rs8095771  | 0,00096 |
| rs12750904 | 0,001   |
| rs2100346  | 0,001   |
| rs907991   | 0,001   |
| rs4143863  | 0,001   |
| rs10501827 | 0,001   |
| rs8069972  | 0,001   |
| rs8064765  | 0,001   |

Supplementary Table S2. DEPICT reported 33 enriched gene sets. ENSG: Ensembl gene; GO: gene ontology; HGNC: Human Genome Organisation Gene Nomenclature Committee; KEGG: Kyoto Encyclopedia of Genes and Genomes; MP: mammalian phenotype ontology.

| #  | Gene set description (DEPICT gene set source)               | Gene set ID provided by DEPICT                            | Nominal <i>p</i>      | log(nominal <i>p</i> ) |
|----|-------------------------------------------------------------|-----------------------------------------------------------|-----------------------|------------------------|
| 1  | RAC3 subnetwork (ENSG)                                      | ENSG00000169750                                           | $1.18 \cdot 10^{-05}$ | -4,928117993           |
| 2  | RAC2 subnetwork (ENSG)                                      | ENSG00000128340                                           | $1.25 \cdot 10^{-05}$ | -4,903089987           |
| 3  | Non-small cell lung cancer (KEGG)                           | KEGG_NON_SMALL_CELL_LUNG_CANCER                           | $3.19 \cdot 10^{-05}$ | -4,496209317           |
| 4  | RAF1 subnetwork (ENSG)                                      | ENSG00000132155                                           | $5.23 \cdot 10^{-05}$ | -4,281498311           |
| 5  | NAT9 subnetwork (ENSG)                                      | ENSG00000109065                                           | $1.10 \cdot 10^{-04}$ | -3,958607315           |
| 6  | Acute myeloid leukemia (KEGG)                               | KEGG_ACUTE_MYELOID_LEUKEMIA                               | $1.40 \cdot 10^{-04}$ | -3,853871964           |
| 7  | Protein serine/threonine/tyrosine kinase activity (GO)      | GO:0004712                                                | $1.63 \cdot 10^{-04}$ | -3,787812396           |
| 8  | CTNNB1 subnetwork (ENSG)                                    | ENSG00000168036                                           | $1.78 \cdot 10^{-04}$ | -3,749579998           |
| 9  | Abnormal osteoclast differentiation (MP)                    | MP:0008396                                                | $1.90 \cdot 10^{-04}$ | -3,721246399           |
| 10 | CEBPB subnetwork (ENSG)                                     | ENSG00000172216                                           | $2.23 \cdot 10^{-04}$ | -3,651695137           |
| 11 | MAP kinase kinase activity (GO)                             | GO:0004708                                                | $2.83 \cdot 10^{-04}$ | -3,548213564           |
| 12 | Signalling by NGF (Reactome)                                | REACTOME_SIGNALLING_BY_NGF                                | $2.98 \cdot 10^{-04}$ | -3,525783736           |
| 13 | Increased percent body fat (MP)                             | MP:0005458                                                | $3.31 \cdot 10^{-04}$ | -3,480172006           |
| 14 | Prolonged estrous cycle (MP)                                | MP:0009006                                                | $3.54 \cdot 10^{-04}$ | -3,450996738           |
| 15 | Downstream TCR signaling (Reactome)                         | REACTOME_DOWNSTREAM_TCR_SIGNALING                         | $3.81 \cdot 10^{-04}$ | -3,419075024           |
| 16 | Downstream signal transduction (Reactome)                   | REACTOME_DOWNSTREAM_SIGNAL_TRANSDUCTION                   | $4.06 \cdot 10^{-04}$ | -3,391473966           |
| 17 | DAG and IP3 signaling (Reactome)                            | REACTOME_DAG_AND_IP3_SIGNALING                            | $4.18 \cdot 10^{-04}$ | -3,378823718           |
| 18 | Phosphoric ester hydrolase activity (GO)                    | GO:0042578                                                | $4.19 \cdot 10^{-04}$ | -3,377785977           |
| 19 | TGOLN2 subnetwork (ENSG)                                    | ENSG00000152291                                           | $4.96 \cdot 10^{-04}$ | -3,304518324           |
| 20 | EGFR interacts with PLCG1 (Reactome)                        | REACTOME_EGFR_INTERACTS_WITH_PHOSPHOLIPASE_C:GAMMA        | $5.22 \cdot 10^{-04}$ | -3,282329497           |
| 21 | TCR signaling (Reactome)                                    | REACTOME_TCR_SIGNALING                                    | $5.33 \cdot 10^{-04}$ | -3,273272791           |
| 22 | PLCG1 events in ERBB2 signaling (Reactome)                  | REACTOME_PLCG1_EVENTS_IN_ERBB2_SIGNALING                  | $5.68 \cdot 10^{-04}$ | -3,245651664           |
| 23 | MAP2K1 subnetwork (ENSG)                                    | ENSG00000169032                                           | $7.12 \cdot 10^{-04}$ | -3,147520006           |
| 24 | NGF signalling via TRKA from the plasma membrane (Reactome) | REACTOME_NGF_SIGNALLING_VIA_TRKA_FROM_THE_PLASMA_MEMBRANE | $7.97 \cdot 10^{-04}$ | -3,098541679           |
| 25 | Enlarged lymph nodes (MP)                                   | MP:0000702                                                | $8.06 \cdot 10^{-04}$ | -3,093664958           |
| 26 | NOD1 subnetwork (ENSG)                                      | ENSG00000106100                                           | $8.08 \cdot 10^{-04}$ | -3,092588639           |
| 27 | Activation of immune response (GO)                          | GO:0002253                                                | $8.14 \cdot 10^{-04}$ | -3,089375595           |
| 28 | Phosphoprotein phosphatase activity (GO)                    | GO:0004721                                                | $8.15 \cdot 10^{-04}$ | -3,088842391           |
| 29 | NGF receptor signaling pathway (GO)                         | GO:0048011                                                | $8.19 \cdot 10^{-04}$ | -3,086716098           |
| 30 | Phosphatase activity (GO)                                   | GO:0016791                                                | $8.64 \cdot 10^{-04}$ | -3,063486258           |
| 31 | Reduced female fertility (MP)                               | MP:0001923                                                | $8.98 \cdot 10^{-04}$ | -3,046723663           |
| 32 | Protein kinase binding (GO)                                 | GO:0019901                                                | $9.31 \cdot 10^{-04}$ | -3,031050319           |
| 33 | Kinase binding (GO)                                         | GO:0019900                                                | $9.54 \cdot 10^{-04}$ | -3,020451625           |

Supplementary Table S3. Representative genes for the biological themes. To understand the biological themes, we determined the top hundred representative genes for each gene set cluster. These genes had the highest absolute weighted mean z-score in the gene set cluster, using the multiplicative inverse of the nominal P of each reconstituted gene set as a weight for each z-score. ENSG: Ensembl gene; GO: gene ontology; KEGG: Kyoto Encyclopedia of Genes and Genomes; MP: mammalian phenotype ontology.

|                          |                                                  |
|--------------------------|--------------------------------------------------|
| <b>Biological theme:</b> | <b>RAC2/RAC3 network</b>                         |
| <b>Gene sets:</b>        | RAC3 subnetwork (ENSG)<br>RAC2 subnetwork (ENSG) |

| Ensembl gene ID | Gene     | Weighted mean z -score | Description                                                                                  |
|-----------------|----------|------------------------|----------------------------------------------------------------------------------------------|
| ENSG00000114331 | ACAP2    | 4,082266               | ArfGAP with coiled-coil, ankyrin repeat and PH domains 2 [Source:HGNC Symbol;Acc:HGNC:16469] |
| ENSG00000136167 | LCP1     | 3,869325               | lymphocyte cytosolic protein 1 [Source:HGNC Symbol;Acc:HGNC:6528]                            |
| ENSG00000108175 | ZMIZ1    | 3,788778               | zinc finger MIZ-type containing 1 [Source:HGNC Symbol;Acc:HGNC:16493]                        |
| ENSG00000117676 | RPS6KA1  | 3,718398               | ribosomal protein S6 kinase A1 [Source:HGNC Symbol;Acc:HGNC:10430]                           |
| ENSG00000134982 | APC      | 3,685608               | APC, WNT signaling pathway regulator [Source:HGNC Symbol;Acc:HGNC:583]                       |
| ENSG00000167377 | ZNF23    | -3,57116               | zinc finger protein 23 [Source:HGNC Symbol;Acc:HGNC:13023]                                   |
| ENSG00000129437 | KLK14    | -3,54709               | kallikrein related peptidase 14 [Source:HGNC Symbol;Acc:HGNC:6362]                           |
| ENSG00000158985 | CDC42SE2 | 3,52261                | CDC42 small effector 2 [Source:HGNC Symbol;Acc:HGNC:18547]                                   |
| ENSG00000132334 | PTPRE    | 3,519643               | protein tyrosine phosphatase, receptor type E [Source:HGNC Symbol;Acc:HGNC:9669]             |
| ENSG00000198879 | SFMBT2   | 3,47089                | Scm-like with four mbt domains 2 [Source:HGNC Symbol;Acc:HGNC:20256]                         |
| ENSG00000184640 | SEPT9    | 3,456023               | septin 9 [Source:HGNC Symbol;Acc:HGNC:7323]                                                  |
| ENSG00000107099 | DOCK8    | 3,406204               | dedicator of cytokinesis 8 [Source:HGNC Symbol;Acc:HGNC:19191]                               |
| ENSG00000089163 | SIRT4    | -3,3535                | sirtuin 4 [Source:HGNC Symbol;Acc:HGNC:14932]                                                |
| ENSG00000142669 | SH3BGL3  | 3,35287                | SH3 domain binding glutamate rich protein like 3 [Source:HGNC Symbol;Acc:HGNC:15568]         |
| ENSG00000186517 | ARHGAP30 | 3,33409                | Rho GTPase activating protein 30 [Source:HGNC Symbol;Acc:HGNC:27414]                         |
| ENSG00000134516 | DOCK2    | 3,32512                | dedicator of cytokinesis 2 [Source:HGNC Symbol;Acc:HGNC:2988]                                |
| ENSG00000165813 | CCDC186  | 3,31568                | coiled-coil domain containing 186 [Source:HGNC Symbol;Acc:HGNC:24349]                        |
| ENSG00000115756 | HPCAL1   | 3,306617               | hippocalcin like 1 [Source:HGNC Symbol;Acc:HGNC:5145]                                        |
| ENSG00000230937 | MIR205HG | 3,278021               | MIR205 host gene [Source:HGNC Symbol;Acc:HGNC:43562]                                         |
| ENSG00000105388 | CEACAM5  | -3,26759               | carcinoembryonic antigen related cell adhesion molecule 5 [Source:HGNC Symbol;Acc:HGNC:1817] |
| ENSG00000179195 | ZNF664   | -3,26443               | zinc finger protein 664 [Source:HGNC Symbol;Acc:HGNC:25406]                                  |
| ENSG00000068724 | TTC7A    | 3,259161               | tetratricopeptide repeat domain 7A [Source:HGNC Symbol;Acc:HGNC:19750]                       |
| ENSG00000107263 | RAPGEF1  | 3,251132               | Rap guanine nucleotide exchange factor 1 [Source:HGNC Symbol;Acc:HGNC:4568]                  |
| ENSG00000160271 | RALGDS   | 3,24888                | ral guanine nucleotide dissociation stimulator [Source:HGNC Symbol;Acc:HGNC:9842]            |
| ENSG00000159840 | ZYX      | 3,244708               | zyxin [Source:HGNC Symbol;Acc:HGNC:13200]                                                    |
| ENSG00000142634 | EFHD2    | 3,20519                | EF-hand domain family member D2 [Source:HGNC Symbol;Acc:HGNC:28670]                          |
| ENSG00000155629 | PIK3AP1  | 3,195289               | phosphoinositide-3-kinase adaptor protein 1 [Source:HGNC Symbol;Acc:HGNC:30034]              |
| ENSG00000129625 | REEP5    | 3,189271               | receptor accessory protein 5 [Source:HGNC Symbol;Acc:HGNC:30077]                             |

|                 |           |          |                                                                                                   |
|-----------------|-----------|----------|---------------------------------------------------------------------------------------------------|
| ENSG00000131236 | CAP1      | 3,132347 | adenylate cyclase associated protein 1 [Source:HGNC Symbol;Acc:HGNC:20040]                        |
| ENSG00000162704 | ARPC5     | 3,130825 | actin related protein 2/3 complex subunit 5 [Source:HGNC Symbol;Acc:HGNC:708]                     |
| ENSG00000143669 | LYST      | 3,102473 | lysosomal trafficking regulator [Source:HGNC Symbol;Acc:HGNC:1968]                                |
| ENSG00000114316 | USP4      | 3,100548 | ubiquitin specific peptidase 4 [Source:HGNC Symbol;Acc:HGNC:12627]                                |
| ENSG00000100263 | RHBDD3    | -3,09891 | rhomboid domain containing 3 [Source:HGNC Symbol;Acc:HGNC:1308]                                   |
| ENSG00000198561 | CTNND1    | 3,088787 | catenin delta 1 [Source:HGNC Symbol;Acc:HGNC:2515]                                                |
| ENSG00000144228 | SPOPL     | 3,083418 | speckle type BTB/POZ protein like [Source:HGNC Symbol;Acc:HGNC:27934]                             |
| ENSG00000177764 | NA        | -3,08322 | NA                                                                                                |
| ENSG00000066084 | DIP2B     | 3,0802   | disco interacting protein 2 homolog B [Source:HGNC Symbol;Acc:HGNC:29284]                         |
| ENSG00000235687 | LINC00993 | 3,079696 | long intergenic non-protein coding RNA 993 [Source:HGNC Symbol;Acc:HGNC:48948]                    |
| ENSG00000186806 | VSIG10L   | -3,06363 | V-set and immunoglobulin domain containing 10 like [Source:HGNC Symbol;Acc:HGNC:27111]            |
| ENSG00000100345 | MYH9      | 3,062658 | myosin heavy chain 9 [Source:HGNC Symbol;Acc:HGNC:7579]                                           |
| ENSG00000197622 | CDC42SE1  | 3,050791 | CDC42 small effector 1 [Source:HGNC Symbol;Acc:HGNC:17719]                                        |
| ENSG00000008196 | TFAP2B    | 3,049955 | transcription factor AP-2 beta [Source:HGNC Symbol;Acc:HGNC:11743]                                |
| ENSG00000140455 | USP3      | 3,048126 | ubiquitin specific peptidase 3 [Source:HGNC Symbol;Acc:HGNC:12626]                                |
| ENSG00000159899 | NPR2      | -3,04151 | natriuretic peptide receptor 2 [Source:HGNC Symbol;Acc:HGNC:7944]                                 |
| ENSG00000139668 | WDFY2     | 3,038018 | WD repeat and FYVE domain containing 2 [Source:HGNC Symbol;Acc:HGNC:20482]                        |
| ENSG00000050030 | KIAA2022  | 3,035292 | KIAA2022 [Source:HGNC Symbol;Acc:HGNC:29433]                                                      |
| ENSG00000161202 | DVL3      | 3,020795 | dishevelled segment polarity protein 3 [Source:HGNC Symbol;Acc:HGNC:3087]                         |
| ENSG00000138071 | ACTR2     | 3,016839 | ARP2 actin related protein 2 homolog [Source:HGNC Symbol;Acc:HGNC:169]                            |
| ENSG00000175376 | EIF1AD    | -3,00443 | eukaryotic translation initiation factor 1A domain containing [Source:HGNC Symbol;Acc:HGNC:28147] |
| ENSG00000248762 |           | -3,0028  |                                                                                                   |
| ENSG00000163466 | ARPC2     | 2,987742 | actin related protein 2/3 complex subunit 2 [Source:HGNC Symbol;Acc:HGNC:705]                     |
| ENSG00000180353 | HCLS1     | 2,981743 | hematopoietic cell-specific Lyn substrate 1 [Source:HGNC Symbol;Acc:HGNC:4844]                    |
| ENSG00000185862 | EVI2B     | 2,976875 | ecotropic viral integration site 2B [Source:HGNC Symbol;Acc:HGNC:3500]                            |
| ENSG00000130755 | GMFG      | 2,967221 | glia maturation factor gamma [Source:HGNC Symbol;Acc:HGNC:4374]                                   |
| ENSG00000089639 | GMIP      | 2,965812 | GEM interacting protein [Source:HGNC Symbol;Acc:HGNC:24852]                                       |
| ENSG00000129167 | TPH1      | -2,96509 | tryptophan hydroxylase 1 [Source:HGNC Symbol;Acc:HGNC:12008]                                      |
| ENSG00000101265 | RASSF2    | 2,964265 | Ras association domain family member 2 [Source:HGNC Symbol;Acc:HGNC:9883]                         |
| ENSG00000143119 | CD53      | 2,963863 | CD53 molecule [Source:HGNC Symbol;Acc:HGNC:1686]                                                  |
| ENSG00000078369 | GNB1      | 2,962238 | G protein subunit beta 1 [Source:HGNC Symbol;Acc:HGNC:4396]                                       |
| ENSG00000137198 | GMPR      | -2,95042 | guanosine monophosphate reductase [Source:HGNC Symbol;Acc:HGNC:4376]                              |
| ENSG00000087253 | LPCAT2    | 2,949326 | lysophosphatidylcholine acyltransferase 2 [Source:HGNC Symbol;Acc:HGNC:26032]                     |
| ENSG00000167613 | LAIR1     | 2,946114 | leukocyte associated immunoglobulin like receptor 1 [Source:HGNC Symbol;Acc:HGNC:6477]            |
| ENSG00000166912 | MTMR10    | 2,941512 | myotubularin related protein 10 [Source:HGNC Symbol;Acc:HGNC:25999]                               |
| ENSG00000109062 | SLC9A3R1  | 2,939624 | SLC9A3 regulator 1 [Source:HGNC Symbol;Acc:HGNC:11075]                                            |
| ENSG00000133678 | TMEM254   | 2,934218 | transmembrane protein 254 [Source:HGNC Symbol;Acc:HGNC:25804]                                     |

|                 |           |          |                                                                                                  |
|-----------------|-----------|----------|--------------------------------------------------------------------------------------------------|
| ENSG00000140368 | PSTPIP1   | 2,920872 | proline-serine-threonine phosphatase interacting protein 1 [Source:HGNC Symbol;Acc:HGNC:9580]    |
| ENSG00000143850 | PLEKHA6   | 2,911262 | pleckstrin homology domain containing A6 [Source:HGNC Symbol;Acc:HGNC:17053]                     |
| ENSG00000230068 | CDC42-IT1 | 2,909927 | CDC42 intronic transcript 1 [Source:HGNC Symbol;Acc:HGNC:41317]                                  |
| ENSG00000162511 | LAPTM5    | 2,906254 | lysosomal protein transmembrane 5 [Source:HGNC Symbol;Acc:HGNC:29612]                            |
| ENSG00000072786 | STK10     | 2,904434 | serine/threonine kinase 10 [Source:HGNC Symbol;Acc:HGNC:11388]                                   |
| ENSG00000254936 |           | -2,89964 |                                                                                                  |
| ENSG00000077549 | CAPZB     | 2,898779 | capping actin protein of muscle Z-line beta subunit [Source:HGNC Symbol;Acc:HGNC:1491]           |
| ENSG00000115091 | ACTR3     | 2,895413 | ARP3 actin related protein 3 homolog [Source:HGNC Symbol;Acc:HGNC:170]                           |
| ENSG00000162571 | TTL10     | 2,893898 | tubulin tyrosine ligase like 10 [Source:HGNC Symbol;Acc:HGNC:26693]                              |
| ENSG00000101132 | PFDN4     | -2,88356 | prefoldin subunit 4 [Source:HGNC Symbol;Acc:HGNC:8868]                                           |
| ENSG00000232267 | ACTR3P2   | 2,883317 | ACTR3 pseudogene 2 [Source:HGNC Symbol;Acc:HGNC:38676]                                           |
| ENSG00000125089 | SH3TC1    | 2,881901 | SH3 domain and tetratricopeptide repeats 1 [Source:HGNC Symbol;Acc:HGNC:26009]                   |
| ENSG00000141480 | ARRB2     | 2,881584 | arrestin beta 2 [Source:HGNC Symbol;Acc:HGNC:712]                                                |
| ENSG00000172795 | DCP2      | 2,880332 | decapping mRNA 2 [Source:HGNC Symbol;Acc:HGNC:24452]                                             |
| ENSG00000148396 | SEC16A    | 2,877623 | SEC16 homolog A, endoplasmic reticulum export factor [Source:HGNC Symbol;Acc:HGNC:29006]         |
| ENSG00000138382 | METTL5    | -2,87192 | methyltransferase like 5 [Source:HGNC Symbol;Acc:HGNC:25006]                                     |
| ENSG00000101336 | HCK       | 2,865032 | HCK proto-oncogene, Src family tyrosine kinase [Source:HGNC Symbol;Acc:HGNC:4840]                |
| ENSG00000188153 | COL4A5    | 2,848853 | collagen type IV alpha 5 chain [Source:HGNC Symbol;Acc:HGNC:2207]                                |
| ENSG00000126860 | EVI2A     | 2,846796 | ecotropic viral integration site 2A [Source:HGNC Symbol;Acc:HGNC:3499]                           |
| ENSG00000186526 | CYP4F8    | 2,8426   | cytochrome P450 family 4 subfamily F member 8 [Source:HGNC Symbol;Acc:HGNC:2648]                 |
| ENSG00000162373 | BEND5     | 2,840534 | BEN domain containing 5 [Source:HGNC Symbol;Acc:HGNC:25668]                                      |
| ENSG00000111404 | RERGL     | 2,838674 | RERG like [Source:HGNC Symbol;Acc:HGNC:26213]                                                    |
| ENSG00000131480 | AOC2      | -2,83776 | amine oxidase, copper containing 2 [Source:HGNC Symbol;Acc:HGNC:549]                             |
| ENSG00000236268 | LINC01361 | -2,83764 | long intergenic non-protein coding RNA 1361 [Source:HGNC Symbol;Acc:HGNC:50595]                  |
| ENSG00000153823 | PID1      | 2,835276 | phosphotyrosine interaction domain containing 1 [Source:HGNC Symbol;Acc:HGNC:26084]              |
| ENSG00000083307 | GRHL2     | 2,831656 | grainyhead like transcription factor 2 [Source:HGNC Symbol;Acc:HGNC:2799]                        |
| ENSG00000113231 | PDE8B     | 2,820239 | phosphodiesterase 8B [Source:HGNC Symbol;Acc:HGNC:8794]                                          |
| ENSG00000100842 | EFS       | 2,818926 | embryonal Fyn-associated substrate [Source:HGNC Symbol;Acc:HGNC:16898]                           |
| ENSG00000137486 | ARRB1     | 2,811192 | arrestin beta 1 [Source:HGNC Symbol;Acc:HGNC:711]                                                |
| ENSG00000120162 | MOB3B     | 2,809979 | MOB kinase activator 3B [Source:HGNC Symbol;Acc:HGNC:23825]                                      |
| ENSG00000172183 | ISG20     | -2,80719 | interferon stimulated exonuclease gene 20 [Source:HGNC Symbol;Acc:HGNC:6130]                     |
| ENSG00000072518 | MARK2     | 2,804749 | microtubule affinity regulating kinase 2 [Source:HGNC Symbol;Acc:HGNC:3332]                      |
| ENSG00000137642 | SORL1     | 2,802471 | sortilin related receptor 1 [Source:HGNC Symbol;Acc:HGNC:11185]                                  |
| ENSG00000125741 | OPA3      | -2,79723 | OPA3, outer mitochondrial membrane lipid metabolism regulator [Source:HGNC Symbol;Acc:HGNC:8142] |
| ENSG00000204856 | FAM216A   | -2,79366 | family with sequence similarity 216 member A [Source:HGNC Symbol;Acc:HGNC:30180]                 |



**Biological theme:****NAT9 network****Gene sets:**

NAT9 subnetwork (ENSG)

| Ensembl gene ID | Gene       | Weighted mean z -score | Description                                                                              |
|-----------------|------------|------------------------|------------------------------------------------------------------------------------------|
| ENSG00000133606 | MKRN1      | 5,163726               | makorin ring finger protein 1 [Source:HGNC Symbol;Acc:HGNC:7112]                         |
| ENSG00000072042 | RDH11      | 4,870137               | retinol dehydrogenase 11 (all-trans/9-cis/11-cis) [Source:HGNC Symbol;Acc:HGNC:17964]    |
| ENSG00000237940 | LINC01238  | 4,48427                | long intergenic non-protein coding RNA 1238 [Source:HGNC Symbol;Acc:HGNC:49795]          |
| ENSG00000213047 | DENND1B    | -4,40425               | DENN domain containing 1B [Source:HGNC Symbol;Acc:HGNC:28404]                            |
| ENSG00000132604 | TERF2      | 4,313336               | telomeric repeat binding factor 2 [Source:HGNC Symbol;Acc:HGNC:11729]                    |
| ENSG00000113552 | GNPDA1     | 4,02803                | glucosamine-6-phosphate deaminase 1 [Source:HGNC Symbol;Acc:HGNC:4417]                   |
| ENSG00000197930 | ERO1A      | 3,940358               | endoplasmic reticulum oxidoreductase 1 alpha [Source:HGNC Symbol;Acc:HGNC:13280]         |
| ENSG00000183166 | CALN1      | 3,931943               | calneuron 1 [Source:HGNC Symbol;Acc:HGNC:13248]                                          |
| ENSG00000227051 | C14orf132  | 3,900367               | chromosome 14 open reading frame 132 [Source:HGNC Symbol;Acc:HGNC:20346]                 |
| ENSG00000173681 | CXorf23    | -3,8711                | chromosome X open reading frame 23 [Source:HGNC Symbol;Acc:HGNC:27413]                   |
| ENSG00000213240 |            | -3,87008               |                                                                                          |
| ENSG00000139625 | MAP3K12    | 3,849265               | mitogen-activated protein kinase kinase kinase 12 [Source:HGNC Symbol;Acc:HGNC:6851]     |
| ENSG00000196123 | KIAA0895L  | 3,786199               | KIAA0895 like [Source:HGNC Symbol;Acc:HGNC:34408]                                        |
| ENSG00000127325 | BEST3      | 3,738082               | bestrophin 3 [Source:HGNC Symbol;Acc:HGNC:17105]                                         |
| ENSG00000151612 | ZNF827     | 3,715385               | zinc finger protein 827 [Source:HGNC Symbol;Acc:HGNC:27193]                              |
| ENSG00000157741 | UBN2       | 3,692975               | ubinuclein 2 [Source:HGNC Symbol;Acc:HGNC:21931]                                         |
| ENSG00000225986 | UBXN10-AS1 | -3,63966               | UBXN10 antisense RNA 1 [Source:HGNC Symbol;Acc:HGNC:41141]                               |
| ENSG00000005483 | KMT2E      | 3,600568               | lysine methyltransferase 2E [Source:HGNC Symbol;Acc:HGNC:18541]                          |
| ENSG00000166848 | TERF2IP    | 3,588258               | TERF2 interacting protein [Source:HGNC Symbol;Acc:HGNC:19246]                            |
| ENSG00000101746 | NOL4       | 3,569744               | nucleolar protein 4 [Source:HGNC Symbol;Acc:HGNC:7870]                                   |
| ENSG00000127995 | CASD1      | 3,514453               | CAS1 domain containing 1 [Source:HGNC Symbol;Acc:HGNC:16014]                             |
| ENSG00000008083 | JARID2     | -3,51418               | jumonji and AT-rich interaction domain containing 2 [Source:HGNC Symbol;Acc:HGNC:6196]   |
| ENSG00000139410 | SDSL       | -3,50504               | serine dehydratase like [Source:HGNC Symbol;Acc:HGNC:30404]                              |
| ENSG00000196968 | FUT11      | 3,472206               | fucosyltransferase 11 [Source:HGNC Symbol;Acc:HGNC:19233]                                |
| ENSG00000163516 | ANKZF1     | 3,471064               | ankyrin repeat and zinc finger domain containing 1 [Source:HGNC Symbol;Acc:HGNC:25527]   |
| ENSG00000225377 | NRSN2-AS1  | 3,470431               | NRSN2 antisense RNA 1 [Source:HGNC Symbol;Acc:HGNC:51222]                                |
| ENSG00000071553 | ATP6AP1    | 3,429073               | ATPase H <sup>+</sup> transporting accessory protein 1 [Source:HGNC Symbol;Acc:HGNC:868] |
| ENSG00000197826 | C4orf22    | 3,423673               | chromosome 4 open reading frame 22 [Source:HGNC Symbol;Acc:HGNC:28554]                   |
| ENSG00000083457 | ITGAE      | -3,38662               | integrin subunit alpha E [Source:HGNC Symbol;Acc:HGNC:6147]                              |
| ENSG00000167508 | MVD        | 3,376736               | mevalonate diphosphate decarboxylase [Source:HGNC Symbol;Acc:HGNC:7529]                  |
| ENSG00000176049 | JAKMIP2    | 3,376575               | janus kinase and microtubule interacting protein 2 [Source:HGNC Symbol;Acc:HGNC:29067]   |
| ENSG00000185928 | NA         | 3,358964               | NA                                                                                       |
| ENSG00000168824 |            | 3,341393               | Neuron-specific protein family member 1 [Source:UniProtKB/Swiss-Prot;Acc:P42857]         |

|                 |            |          |                                                                                                      |
|-----------------|------------|----------|------------------------------------------------------------------------------------------------------|
| ENSG00000122299 | ZC3H7A     | 3,321419 | zinc finger CCCH-type containing 7A [Source:HGNC Symbol;Acc:HGNC:30959]                              |
| ENSG00000166963 | MAP1A      | 3,286456 | microtubule associated protein 1A [Source:HGNC Symbol;Acc:HGNC:6835]                                 |
| ENSG00000250582 | SMAD1-AS2  | 3,279362 | SMAD1 antisense RNA 2 [Source:HGNC Symbol;Acc:HGNC:49381]                                            |
| ENSG00000196440 | ARMCX4     | 3,260547 | armadillo repeat containing, X-linked 4 [Source:HGNC Symbol;Acc:HGNC:28615]                          |
| ENSG00000119669 | IRF2BPL    | 3,256765 | interferon regulatory factor 2 binding protein like [Source:HGNC Symbol;Acc:HGNC:14282]              |
| ENSG00000254815 |            | 3,247514 |                                                                                                      |
| ENSG00000245008 |            | 3,242292 |                                                                                                      |
| ENSG00000152208 | GRID2      | 3,238902 | glutamate ionotropic receptor delta type subunit 2 [Source:HGNC Symbol;Acc:HGNC:4576]                |
| ENSG00000105438 | KDELR1     | 3,224069 | KDEL endoplasmic reticulum protein retention receptor 1 [Source:HGNC Symbol;Acc:HGNC:6304]           |
| ENSG00000141279 | NPEPPS     | 3,21015  | aminopeptidase puromycin sensitive [Source:HGNC Symbol;Acc:HGNC:7900]                                |
| ENSG00000154143 | PANX3      | 3,198579 | pannexin 3 [Source:HGNC Symbol;Acc:HGNC:20573]                                                       |
| ENSG00000180773 | SLC36A4    | 3,18908  | solute carrier family 36 member 4 [Source:HGNC Symbol;Acc:HGNC:19660]                                |
| ENSG00000135502 | SLC26A10   | 3,17146  | solute carrier family 26 member 10 [Source:HGNC Symbol;Acc:HGNC:14470]                               |
| ENSG00000109046 | WSB1       | 3,16954  | WD repeat and SOCS box containing 1 [Source:HGNC Symbol;Acc:HGNC:19221]                              |
| ENSG00000151575 | TEX9       | 3,164131 | testis expressed 9 [Source:HGNC Symbol;Acc:HGNC:29585]                                               |
| ENSG00000198105 | ZNF248     | 3,162619 | zinc finger protein 248 [Source:HGNC Symbol;Acc:HGNC:13041]                                          |
| ENSG00000184939 | ZFP90      | 3,146268 | ZFP90 zinc finger protein [Source:HGNC Symbol;Acc:HGNC:23329]                                        |
| ENSG00000172766 | NAA16      | 3,140273 | N(alpha)-acetyltransferase 16, NatA auxiliary subunit [Source:HGNC Symbol;Acc:HGNC:26164]            |
| ENSG00000229191 |            | -3,14024 |                                                                                                      |
| ENSG00000181378 | CFAP65     | 3,139302 | cilia and flagella associated protein 65 [Source:HGNC Symbol;Acc:HGNC:25325]                         |
| ENSG00000172458 | IL17D      | 3,137064 | interleukin 17D [Source:HGNC Symbol;Acc:HGNC:5984]                                                   |
| ENSG00000250510 | GPR162     | 3,125326 | G protein-coupled receptor 162 [Source:HGNC Symbol;Acc:HGNC:16693]                                   |
| ENSG00000164038 | SLC9B2     | 3,118095 | solute carrier family 9 member B2 [Source:HGNC Symbol;Acc:HGNC:25143]                                |
| ENSG00000099194 | SCD        | 3,099114 | stearoyl-CoA desaturase [Source:HGNC Symbol;Acc:HGNC:10571]                                          |
| ENSG00000114062 | UBE3A      | 3,075079 | ubiquitin protein ligase E3A [Source:HGNC Symbol;Acc:HGNC:12496]                                     |
| ENSG00000178988 | MRFAP1L1   | 3,069838 | Morf4 family associated protein 1 like 1 [Source:HGNC Symbol;Acc:HGNC:28796]                         |
| ENSG00000204428 | LY6G5C     | 3,061001 | lymphocyte antigen 6 family member G5C [Source:HGNC Symbol;Acc:HGNC:13932]                           |
| ENSG00000138741 | TRPC3      | 3,059792 | transient receptor potential cation channel subfamily C member 3 [Source:HGNC Symbol;Acc:HGNC:12335] |
| ENSG00000007402 | CACNA2D2   | 3,051591 | calcium voltage-gated channel auxiliary subunit alpha2delta 2 [Source:HGNC Symbol;Acc:HGNC:1400]     |
| ENSG00000107341 | UBE2R2     | 3,051217 | ubiquitin conjugating enzyme E2 R2 [Source:HGNC Symbol;Acc:HGNC:19907]                               |
| ENSG00000164211 | STARD4     | 3,04434  | StAR related lipid transfer domain containing 4 [Source:HGNC Symbol;Acc:HGNC:18058]                  |
| ENSG00000234264 | DEPDC1-AS1 | 3,040625 | DEPDC1 antisense RNA 1 [Source:HGNC Symbol;Acc:HGNC:50592]                                           |
| ENSG00000237928 | NFIA-AS2   | 3,037764 | NFIA antisense RNA 2 [Source:HGNC Symbol;Acc:HGNC:40401]                                             |
| ENSG00000182473 | EXOC7      | -3,03746 | exocyst complex component 7 [Source:HGNC Symbol;Acc:HGNC:23214]                                      |
| ENSG00000064999 | ANKS1A     | -3,03535 | ankyrin repeat and sterile alpha motif domain containing 1A [Source:HGNC Symbol;Acc:HGNC:20961]      |
| ENSG00000254506 |            | -3,02781 |                                                                                                      |
| ENSG00000114738 | MAPKAPK3   | -3,02608 | mitogen-activated protein kinase-activated protein kinase 3 [Source:HGNC Symbol;Acc:HGNC:6888]       |

|                 |             |          |                                                                                     |
|-----------------|-------------|----------|-------------------------------------------------------------------------------------|
| ENSG00000145860 | RNF145      | 3,022123 | ring finger protein 145 [Source:HGNC Symbol;Acc:HGNC:20853]                         |
| ENSG00000184293 | CLECL1      | -3,01752 | C-type lectin like 1 [Source:HGNC Symbol;Acc:HGNC:24462]                            |
| ENSG00000008300 | CELSR3      | 3,016192 | cadherin EGF LAG seven-pass G-type receptor 3 [Source:HGNC Symbol;Acc:HGNC:3230]    |
| ENSG00000092964 | DPYSL2      | 3,006578 | dihydropyrimidinase like 2 [Source:HGNC Symbol;Acc:HGNC:3014]                       |
| ENSG00000178078 | STAP2       | -2,99912 | signal transducing adaptor family member 2 [Source:HGNC Symbol;Acc:HGNC:30430]      |
| ENSG00000126351 | THRA        | 2,995614 | thyroid hormone receptor, alpha [Source:HGNC Symbol;Acc:HGNC:11796]                 |
| ENSG00000136929 | HEMGN       | 2,994556 | hemogen [Source:HGNC Symbol;Acc:HGNC:17509]                                         |
| ENSG00000177732 | SOX12       | 2,993922 | SRY-box 12 [Source:HGNC Symbol;Acc:HGNC:11198]                                      |
| ENSG00000197457 | STMN3       | 2,991891 | stathmin 3 [Source:HGNC Symbol;Acc:HGNC:15926]                                      |
| ENSG00000247095 | MIR210HG    | 2,987062 | MIR210 host gene [Source:HGNC Symbol;Acc:HGNC:39524]                                |
| ENSG00000204060 | FOXO6       | 2,984134 | forkhead box O6 [Source:HGNC Symbol;Acc:HGNC:24814]                                 |
| ENSG00000132170 | PPARG       | -2,97811 | peroxisome proliferator activated receptor gamma [Source:HGNC Symbol;Acc:HGNC:9236] |
| ENSG00000178802 | MPI         | 2,97691  | mannose phosphate isomerase [Source:HGNC Symbol;Acc:HGNC:7216]                      |
| ENSG00000161958 | FGF11       | 2,976762 | fibroblast growth factor 11 [Source:HGNC Symbol;Acc:HGNC:3667]                      |
| ENSG00000052795 | FNIP2       | 2,976298 | folliculin interacting protein 2 [Source:HGNC Symbol;Acc:HGNC:29280]                |
| ENSG00000153253 | SCN3A       | 2,971038 | sodium voltage-gated channel alpha subunit 3 [Source:HGNC Symbol;Acc:HGNC:10590]    |
| ENSG00000143367 | TUFT1       | -2,96776 | tuftelin 1 [Source:HGNC Symbol;Acc:HGNC:12422]                                      |
| ENSG00000175265 | GOLGA8A     | 2,965306 | golgin A8 family member A [Source:HGNC Symbol;Acc:HGNC:31972]                       |
| ENSG00000203867 | RBM20       | -2,95801 | RNA binding motif protein 20 [Source:HGNC Symbol;Acc:HGNC:27424]                    |
| ENSG00000186480 | INSIG1      | 2,94771  | insulin induced gene 1 [Source:HGNC Symbol;Acc:HGNC:6083]                           |
| ENSG00000156931 | VPS8        | -2,93698 | VPS8, CORVET complex subunit [Source:HGNC Symbol;Acc:HGNC:29122]                    |
| ENSG00000233404 | NA          | -2,9369  | NA                                                                                  |
| ENSG00000179029 | TMEM107     | 2,933892 | transmembrane protein 107 [Source:HGNC Symbol;Acc:HGNC:28128]                       |
| ENSG00000105656 | ELL         | 2,93334  | elongation factor for RNA polymerase II [Source:HGNC Symbol;Acc:HGNC:23114]         |
| ENSG00000144567 | RETREG2     | 2,929924 | reticulophagy regulator family member 2 [Source:HGNC Symbol;Acc:HGNC:28450]         |
| ENSG00000088756 | ARHGAP28    | -2,91809 | Rho GTPase activating protein 28 [Source:HGNC Symbol;Acc:HGNC:25509]                |
| ENSG00000007968 | E2F2        | 2,917532 | E2F transcription factor 2 [Source:HGNC Symbol;Acc:HGNC:3114]                       |
| ENSG00000134815 | DHX34       | -2,91423 | DExH-box helicase 34 [Source:HGNC Symbol;Acc:HGNC:16719]                            |
| ENSG00000185838 | GNB1L       | -2,90495 | G protein subunit beta 1 like [Source:HGNC Symbol;Acc:HGNC:4397]                    |
| ENSG00000255559 | ZNF252P-AS1 | -2,90315 | ZNF252P antisense RNA 1 [Source:HGNC Symbol;Acc:HGNC:27821]                         |

**Biological theme:****Protein serine/threonine/tyrosine kinase activity****Gene sets:**

Protein serine/threonine/tyrosine kinase activity (GO)

MAP kinase kinase activity (GO)

| Ensembl gene ID | Gene       | Weighted mean z -score | Description                                                                                   |
|-----------------|------------|------------------------|-----------------------------------------------------------------------------------------------|
| ENSG0000051009  | FAM160A2   | 3,843557               | family with sequence similarity 160 member A2 [Source:HGNC Symbol;Acc:HGNC:25378]             |
| ENSG00000177479 | ARIH2      | 3,661596               | ariadne RBR E3 ubiquitin protein ligase 2 [Source:HGNC Symbol;Acc:HGNC:690]                   |
| ENSG00000196544 | BORCS6     | 3,547454               | BLOC-1 related complex subunit 6 [Source:HGNC Symbol;Acc:HGNC:25939]                          |
| ENSG00000237512 | UNC5B-AS1  | -3,51724               | UNC5B antisense RNA 1 [Source:HGNC Symbol;Acc:HGNC:45096]                                     |
| ENSG00000179335 | CLK3       | 3,462331               | CDC like kinase 3 [Source:HGNC Symbol;Acc:HGNC:2071]                                          |
| ENSG00000245719 |            | 3,432129               |                                                                                               |
| ENSG00000159346 | ADIPOR1    | 3,431398               | adiponectin receptor 1 [Source:HGNC Symbol;Acc:HGNC:24040]                                    |
| ENSG00000164068 | RNF123     | 3,424813               | ring finger protein 123 [Source:HGNC Symbol;Acc:HGNC:21148]                                   |
| ENSG00000153250 | RBMS1      | 3,408851               | RNA binding motif single stranded interacting protein 1 [Source:HGNC Symbol;Acc:HGNC:9907]    |
| ENSG00000091106 | NLRC4      | 3,390213               | NLR family CARD domain containing 4 [Source:HGNC Symbol;Acc:HGNC:16412]                       |
| ENSG00000093167 | LRRFIP2    | 3,375932               | LRR binding FLII interacting protein 2 [Source:HGNC Symbol;Acc:HGNC:6703]                     |
| ENSG00000070423 | RNF126     | 3,342756               | ring finger protein 126 [Source:HGNC Symbol;Acc:HGNC:21151]                                   |
| ENSG00000154370 | TRIM11     | 3,342572               | tripartite motif containing 11 [Source:HGNC Symbol;Acc:HGNC:16281]                            |
| ENSG00000234336 | JAZF1-AS1  | 3,312443               | JAZF1 antisense RNA 1 [Source:HGNC Symbol;Acc:HGNC:41218]                                     |
| ENSG00000204086 | RPA4       | 3,290707               | replication protein A4 [Source:HGNC Symbol;Acc:HGNC:30305]                                    |
| ENSG00000171425 | ZNF581     | 3,280113               | zinc finger protein 581 [Source:HGNC Symbol;Acc:HGNC:25017]                                   |
| ENSG00000006459 | KDM7A      | 3,249877               | lysine demethylase 7A [Source:HGNC Symbol;Acc:HGNC:22224]                                     |
| ENSG00000065559 | MAP2K4     | 3,24894                | mitogen-activated protein kinase kinase 4 [Source:HGNC Symbol;Acc:HGNC:6844]                  |
| ENSG00000180667 | YOD1       | 3,248244               | YOD1 deubiquitinase [Source:HGNC Symbol;Acc:HGNC:25035]                                       |
| ENSG00000137871 | ZNF280D    | 3,229429               | zinc finger protein 280D [Source:HGNC Symbol;Acc:HGNC:25953]                                  |
| ENSG00000182500 | NA         | 3,21945                | NA                                                                                            |
| ENSG00000114268 | PFKFB4     | 3,158344               | 6-phosphofructo-2-kinase/fructose-2,6-biphosphatase 4 [Source:HGNC Symbol;Acc:HGNC:8875]      |
| ENSG00000099804 | CDC34      | 3,117766               | cell division cycle 34 [Source:HGNC Symbol;Acc:HGNC:1734]                                     |
| ENSG00000172765 | TMCC1      | 3,116088               | transmembrane and coiled-coil domain family 1 [Source:HGNC Symbol;Acc:HGNC:29116]             |
| ENSG00000089597 | GANAB      | -3,09935               | glucosidase II alpha subunit [Source:HGNC Symbol;Acc:HGNC:4138]                               |
| ENSG00000139132 | FGD4       | 3,090232               | FYVE, RhoGEF and PH domain containing 4 [Source:HGNC Symbol;Acc:HGNC:19125]                   |
| ENSG00000181104 | F2R        | -3,07464               | coagulation factor II thrombin receptor [Source:HGNC Symbol;Acc:HGNC:3537]                    |
| ENSG00000099204 | ABLIM1     | -3,06619               | actin binding LIM protein 1 [Source:HGNC Symbol;Acc:HGNC:78]                                  |
| ENSG00000175727 | MLXIP      | 3,060096               | MLX interacting protein [Source:HGNC Symbol;Acc:HGNC:17055]                                   |
| ENSG00000128394 | APOBEC3F   | -3,04877               | apolipoprotein B mRNA editing enzyme catalytic subunit 3F [Source:HGNC Symbol;Acc:HGNC:17356] |
| ENSG00000164086 | DUSP7      | 3,021925               | dual specificity phosphatase 7 [Source:HGNC Symbol;Acc:HGNC:3073]                             |
| ENSG00000204282 | TNRC6C-AS1 | 3,008733               | TNRC6C antisense RNA 1 [Source:HGNC Symbol;Acc:HGNC:44360]                                    |

|                 |           |          |                                                                                   |
|-----------------|-----------|----------|-----------------------------------------------------------------------------------|
| ENSG00000146054 | TRIM7     | 3,007035 | tripartite motif containing 7 [Source:HGNC Symbol;Acc:HGNC:16278]                 |
| ENSG00000137764 | MAP2K5    | 2,989935 | mitogen-activated protein kinase kinase 5 [Source:HGNC Symbol;Acc:HGNC:6845]      |
| ENSG00000214013 | GANC      | 2,985613 | glucosidase alpha, neutral C [Source:HGNC Symbol;Acc:HGNC:4139]                   |
| ENSG00000198853 | RUSC2     | 2,966409 | RUN and SH3 domain containing 2 [Source:HGNC Symbol;Acc:HGNC:23625]               |
| ENSG00000226900 |           | -2,96372 |                                                                                   |
| ENSG00000162746 | FCRLB     | 2,955003 | Fc receptor like B [Source:HGNC Symbol;Acc:HGNC:26431]                            |
| ENSG00000118298 | CA14      | 2,943536 | carbonic anhydrase 14 [Source:HGNC Symbol;Acc:HGNC:1372]                          |
| ENSG00000233968 |           | -2,92361 |                                                                                   |
| ENSG00000146809 | ASB15     | 2,918978 | ankyrin repeat and SOCS box containing 15 [Source:HGNC Symbol;Acc:HGNC:19767]     |
| ENSG00000144659 | SLC25A38  | 2,908268 | solute carrier family 25 member 38 [Source:HGNC Symbol;Acc:HGNC:26054]            |
| ENSG00000179363 | TMEM31    | 2,901561 | transmembrane protein 31 [Source:HGNC Symbol;Acc:HGNC:28601]                      |
| ENSG00000085978 | ATG16L1   | 2,88723  | autophagy related 16 like 1 [Source:HGNC Symbol;Acc:HGNC:21498]                   |
| ENSG00000070759 | TESK2     | 2,883233 | testis-specific kinase 2 [Source:HGNC Symbol;Acc:HGNC:11732]                      |
| ENSG00000106991 | ENG       | -2,87189 | endoglin [Source:HGNC Symbol;Acc:HGNC:3349]                                       |
| ENSG00000093010 | COMT      | -2,86549 | catechol-O-methyltransferase [Source:HGNC Symbol;Acc:HGNC:2228]                   |
| ENSG00000065970 | FOXJ2     | 2,862791 | forkhead box J2 [Source:HGNC Symbol;Acc:HGNC:24818]                               |
| ENSG00000128567 | PODXL     | -2,86274 | podocalyxin like [Source:HGNC Symbol;Acc:HGNC:9171]                               |
| ENSG00000163812 | ZDHHC3    | 2,859447 | zinc finger DHHC-type containing 3 [Source:HGNC Symbol;Acc:HGNC:18470]            |
| ENSG00000240476 | LINC00973 | 2,858128 | long intergenic non-protein coding RNA 973 [Source:HGNC Symbol;Acc:HGNC:48868]    |
| ENSG00000167671 | UBXN6     | 2,854637 | UBX domain protein 6 [Source:HGNC Symbol;Acc:HGNC:14928]                          |
| ENSG00000204789 | ZNF204P   | 2,853256 | zinc finger protein 204, pseudogene [Source:HGNC Symbol;Acc:HGNC:12995]           |
| ENSG00000138738 | PRDM5     | 2,8532   | PR/SET domain 5 [Source:HGNC Symbol;Acc:HGNC:9349]                                |
| ENSG00000242612 | DECR2     | -2,8477  | 2,4-dienoyl-CoA reductase 2 [Source:HGNC Symbol;Acc:HGNC:2754]                    |
| ENSG00000175984 | DENND2C   | 2,844484 | DENN domain containing 2C [Source:HGNC Symbol;Acc:HGNC:24748]                     |
| ENSG00000165886 | UBTD1     | 2,842611 | ubiquitin domain containing 1 [Source:HGNC Symbol;Acc:HGNC:25683]                 |
| ENSG00000163512 | AZI2      | 2,837325 | 5-azacytidine induced 2 [Source:HGNC Symbol;Acc:HGNC:24002]                       |
| ENSG00000133069 | TMCC2     | 2,836082 | transmembrane and coiled-coil domain family 2 [Source:HGNC Symbol;Acc:HGNC:24239] |
| ENSG00000070610 | GBA2      | 2,833408 | glucosylceramidase beta 2 [Source:HGNC Symbol;Acc:HGNC:18986]                     |
| ENSG00000226846 | LINC00348 | -2,82892 | long intergenic non-protein coding RNA 348 [Source:HGNC Symbol;Acc:HGNC:42658]    |
| ENSG00000141084 | RANBP10   | 2,815126 | RAN binding protein 10 [Source:HGNC Symbol;Acc:HGNC:29285]                        |
| ENSG00000225377 | NRSN2-AS1 | -2,7962  | NRSN2 antisense RNA 1 [Source:HGNC Symbol;Acc:HGNC:51222]                         |
| ENSG00000169914 | OTUD3     | 2,79156  | OTU deubiquitinase 3 [Source:HGNC Symbol;Acc:HGNC:29038]                          |
| ENSG00000111729 | CLEC4A    | 2,787832 | C-type lectin domain family 4 member A [Source:HGNC Symbol;Acc:HGNC:13257]        |
| ENSG00000196433 | ASMT      | -2,78749 | acetylserotonin O-methyltransferase [Source:HGNC Symbol;Acc:HGNC:750]             |
| ENSG00000075413 | MARK3     | 2,785411 | microtubule affinity regulating kinase 3 [Source:HGNC Symbol;Acc:HGNC:6897]       |
| ENSG00000134444 | KIAA1468  | 2,782867 | KIAA1468 [Source:HGNC Symbol;Acc:HGNC:29289]                                      |
| ENSG00000198625 | MDM4      | 2,776365 | MDM4, p53 regulator [Source:HGNC Symbol;Acc:HGNC:6974]                            |

|                 |           |          |                                                                                                         |
|-----------------|-----------|----------|---------------------------------------------------------------------------------------------------------|
| ENSG00000142511 | GPR32     | -2,74158 | G protein-coupled receptor 32 [Source:HGNC Symbol;Acc:HGNC:4487]                                        |
| ENSG00000105550 | FGF21     | -2,73307 | fibroblast growth factor 21 [Source:HGNC Symbol;Acc:HGNC:3678]                                          |
| ENSG00000182606 | TRAK1     | 2,73008  | trafficking kinesin protein 1 [Source:HGNC Symbol;Acc:HGNC:29947]                                       |
| ENSG00000235008 |           | -2,72993 |                                                                                                         |
| ENSG00000180304 | OAZ2      | 2,725851 | ornithine decarboxylase antizyme 2 [Source:HGNC Symbol;Acc:HGNC:8096]                                   |
| ENSG00000129355 | CDKN2D    | 2,719689 | cyclin dependent kinase inhibitor 2D [Source:HGNC Symbol;Acc:HGNC:1790]                                 |
| ENSG00000101346 | POFUT1    | -2,71952 | protein O-fucosyltransferase 1 [Source:HGNC Symbol;Acc:HGNC:14988]                                      |
| ENSG00000100614 | PPM1A     | 2,717327 | protein phosphatase, Mg <sup>2+</sup> /Mn <sup>2+</sup> dependent 1A [Source:HGNC Symbol;Acc:HGNC:9275] |
| ENSG00000154822 | PLCL2     | 2,710696 | phospholipase C like 2 [Source:HGNC Symbol;Acc:HGNC:9064]                                               |
| ENSG00000238098 | ABCA17P   | -2,70513 | ATP binding cassette subfamily A member 17, pseudogene [Source:HGNC Symbol;Acc:HGNC:32972]              |
| ENSG00000175931 | UBE2O     | 2,704673 | ubiquitin conjugating enzyme E2 O [Source:HGNC Symbol;Acc:HGNC:29554]                                   |
| ENSG00000104848 | KCNA7     | 2,703474 | potassium voltage-gated channel subfamily A member 7 [Source:HGNC Symbol;Acc:HGNC:6226]                 |
| ENSG00000203601 | LINC00970 | 2,699312 | long intergenic non-protein coding RNA 970 [Source:HGNC Symbol;Acc:HGNC:48730]                          |
| ENSG00000143303 | RRNAD1    | 2,696598 | ribosomal RNA adenine dimethylase domain containing 1 [Source:HGNC Symbol;Acc:HGNC:24273]               |
| ENSG00000088826 | SMOX      | 2,69163  | spermine oxidase [Source:HGNC Symbol;Acc:HGNC:15862]                                                    |
| ENSG00000149716 | ORAOV1    | 2,680456 | oral cancer overexpressed 1 [Source:HGNC Symbol;Acc:HGNC:17589]                                         |
| ENSG00000254082 | NA        | -2,67916 | NA                                                                                                      |
| ENSG00000117616 | RSRP1     | 2,679137 | arginine and serine rich protein 1 [Source:HGNC Symbol;Acc:HGNC:25234]                                  |
| ENSG00000145416 | MARCH1    | 2,678211 | membrane associated ring-CH-type finger 1 [Source:HGNC Symbol;Acc:HGNC:26077]                           |
| ENSG0000022840  | RNF10     | 2,674946 | ring finger protein 10 [Source:HGNC Symbol;Acc:HGNC:10055]                                              |
| ENSG00000135766 | EGLN1     | 2,673763 | egl-9 family hypoxia inducible factor 1 [Source:HGNC Symbol;Acc:HGNC:1232]                              |
| ENSG00000176714 | CCDC121   | -2,66861 | coiled-coil domain containing 121 [Source:HGNC Symbol;Acc:HGNC:25833]                                   |
| ENSG00000160131 | VMA21     | -2,66647 | VMA21, vacuolar ATPase assembly factor [Source:HGNC Symbol;Acc:HGNC:22082]                              |
| ENSG00000139668 | WDFY2     | 2,663186 | WD repeat and FYVE domain containing 2 [Source:HGNC Symbol;Acc:HGNC:20482]                              |
| ENSG00000100364 | KIAA0930  | 2,661839 | KIAA0930 [Source:HGNC Symbol;Acc:HGNC:1314]                                                             |
| ENSG00000232103 | NA        | -2,65952 | NA                                                                                                      |
| ENSG00000171603 | CLSTN1    | -2,65158 | calsyntenin 1 [Source:HGNC Symbol;Acc:HGNC:17447]                                                       |
| ENSG00000125971 | DYNLRB1   | -2,6468  | dynein light chain roadblock-type 1 [Source:HGNC Symbol;Acc:HGNC:15468]                                 |
| ENSG00000125965 | GDF5      | -2,64135 | growth differentiation factor 5 [Source:HGNC Symbol;Acc:HGNC:4220]                                      |
| ENSG00000105698 | USF2      | 2,639631 | upstream transcription factor 2, c-fos interacting [Source:HGNC Symbol;Acc:HGNC:12594]                  |
| ENSG00000227456 | LINC00310 | 2,638308 | long intergenic non-protein coding RNA 310 [Source:HGNC Symbol;Acc:HGNC:16414]                          |

**Biological theme:****Gene sets:****Ras-MAP kinase signalling cascade**

PLCG1 events in ERBB2 signaling (Reactome)  
 EGFR interacts with PLCG1 (Reactome)  
 DAG and IP3 signaling (Reactome)  
 NGF receptor signaling pathway (GO)  
 NGF signalling via TRKA from the plasma membrane (Reactome)  
 MAP2K1 subnetwork (ENSG)  
 TGOLN2 subnetwork (ENSG)  
 Downstream signal transduction (Reactome)  
 Signalling by NGF (Reactome)  
 CEBPB subnetwork (ENSG)  
 CTNNB1 subnetwork (ENSG)  
 Acute myeloid leukemia (KEGG)  
 RAF1 subnetwork (ENSG)  
 Non-small cell lung cancer (KEGG)

| Ensembl gene ID | Gene    | Weighted mean z -score | Description                                                                         |
|-----------------|---------|------------------------|-------------------------------------------------------------------------------------|
| ENSG00000105701 | FKBP8   | 3,362565               | FK506 binding protein 8 [Source:HGNC Symbol;Acc:HGNC:3724]                          |
| ENSG00000172354 | GNB2    | 3,349456               | G protein subunit beta 2 [Source:HGNC Symbol;Acc:HGNC:4398]                         |
| ENSG00000126767 | ELK1    | 3,04926                | ELK1, ETS transcription factor [Source:HGNC Symbol;Acc:HGNC:3321]                   |
| ENSG00000072518 | MARK2   | 2,863907               | microtubule affinity regulating kinase 2 [Source:HGNC Symbol;Acc:HGNC:3332]         |
| ENSG00000174903 | RAB1B   | 2,829124               | RAB1B, member RAS oncogene family [Source:HGNC Symbol;Acc:HGNC:18370]               |
| ENSG00000160113 | NR2F6   | 2,783683               | nuclear receptor subfamily 2 group F member 6 [Source:HGNC Symbol;Acc:HGNC:7977]    |
| ENSG00000112576 | CCND3   | 2,775147               | cyclin D3 [Source:HGNC Symbol;Acc:HGNC:1585]                                        |
| ENSG00000078369 | GNB1    | 2,690021               | G protein subunit beta 1 [Source:HGNC Symbol;Acc:HGNC:4396]                         |
| ENSG00000103495 | MAZ     | 2,687244               | MYC associated zinc finger protein [Source:HGNC Symbol;Acc:HGNC:6914]               |
| ENSG00000148341 | SH3GLB2 | 2,669614               | SH3 domain containing GRB2 like, endophilin B2 [Source:HGNC Symbol;Acc:HGNC:10834]  |
| ENSG00000088256 | GNA11   | 2,66894                | G protein subunit alpha 11 [Source:HGNC Symbol;Acc:HGNC:4379]                       |
| ENSG00000130311 | DDA1    | 2,658982               | DET1 and DDB1 associated 1 [Source:HGNC Symbol;Acc:HGNC:28360]                      |
| ENSG00000107929 | LARP4B  | 2,658797               | La ribonucleoprotein domain family member 4B [Source:HGNC Symbol;Acc:HGNC:28987]    |
| ENSG00000173020 | GRK2    | 2,64296                | G protein-coupled receptor kinase 2 [Source:HGNC Symbol;Acc:HGNC:289]               |
| ENSG00000105568 | PPP2R1A | 2,629801               | protein phosphatase 2 scaffold subunit Aalpha [Source:HGNC Symbol;Acc:HGNC:9302]    |
| ENSG0000014216  | CAPN1   | 2,629618               | calpain 1 [Source:HGNC Symbol;Acc:HGNC:1476]                                        |
| ENSG00000104964 | AES     | 2,585691               | amino-terminal enhancer of split [Source:HGNC Symbol;Acc:HGNC:307]                  |
| ENSG00000187838 | PLSCR3  | 2,579722               | phospholipid scramblase 3 [Source:HGNC Symbol;Acc:HGNC:16495]                       |
| ENSG00000106367 | AP1S1   | 2,575291               | adaptor related protein complex 1 sigma 1 subunit [Source:HGNC Symbol;Acc:HGNC:559] |
| ENSG00000141522 | ARHGDI1 | 2,570773               | Rho GDP dissociation inhibitor alpha [Source:HGNC Symbol;Acc:HGNC:678]              |

|                 |         |          |                                                                                                            |
|-----------------|---------|----------|------------------------------------------------------------------------------------------------------------|
| ENSG00000130725 | UBE2M   | 2,547863 | ubiquitin conjugating enzyme E2 M [Source:HGNC Symbol;Acc:HGNC:12491]                                      |
| ENSG00000119487 | MAPKAP1 | 2,547659 | mitogen-activated protein kinase associated protein 1 [Source:HGNC Symbol;Acc:HGNC:18752]                  |
| ENSG00000128989 | ARPP19  | 2,52377  | cAMP regulated phosphoprotein 19 [Source:HGNC Symbol;Acc:HGNC:16967]                                       |
| ENSG00000169410 | PTPN9   | 2,502804 | protein tyrosine phosphatase, non-receptor type 9 [Source:HGNC Symbol;Acc:HGNC:9661]                       |
| ENSG00000079805 | DNM2    | 2,501621 | dynamin 2 [Source:HGNC Symbol;Acc:HGNC:2974]                                                               |
| ENSG00000048740 | CELF2   | 2,500813 | CUGBP Elav-like family member 2 [Source:HGNC Symbol;Acc:HGNC:2550]                                         |
| ENSG00000156052 | GNAQ    | 2,483294 | G protein subunit alpha q [Source:HGNC Symbol;Acc:HGNC:4390]                                               |
| ENSG00000172531 | PPP1CA  | 2,483062 | protein phosphatase 1 catalytic subunit alpha [Source:HGNC Symbol;Acc:HGNC:9281]                           |
| ENSG00000133243 | BTBD2   | 2,481601 | BTB domain containing 2 [Source:HGNC Symbol;Acc:HGNC:15504]                                                |
| ENSG00000165807 | PPP1R36 | -2,47004 | protein phosphatase 1 regulatory subunit 36 [Source:HGNC Symbol;Acc:HGNC:20097]                            |
| ENSG00000079335 | CDC14A  | 2,458279 | cell division cycle 14A [Source:HGNC Symbol;Acc:HGNC:1718]                                                 |
| ENSG00000102225 | CDK16   | 2,453495 | cyclin dependent kinase 16 [Source:HGNC Symbol;Acc:HGNC:8749]                                              |
| ENSG00000169926 | KLF13   | 2,450178 | Kruppel like factor 13 [Source:HGNC Symbol;Acc:HGNC:13672]                                                 |
| ENSG00000114353 | GNAI2   | 2,433884 | G protein subunit alpha i2 [Source:HGNC Symbol;Acc:HGNC:4385]                                              |
| ENSG00000065923 | SLC9A7  | 2,433103 | solute carrier family 9 member A7 [Source:HGNC Symbol;Acc:HGNC:17123]                                      |
| ENSG00000155868 | MED7    | -2,4319  | mediator complex subunit 7 [Source:HGNC Symbol;Acc:HGNC:2378]                                              |
| ENSG00000175215 | CTDSP2  | 2,424457 | CTD small phosphatase 2 [Source:HGNC Symbol;Acc:HGNC:17077]                                                |
| ENSG00000185236 | RAB11B  | 2,423842 | RAB11B, member RAS oncogene family [Source:HGNC Symbol;Acc:HGNC:9761]                                      |
| ENSG00000063245 | EPN1    | 2,418201 | epsin 1 [Source:HGNC Symbol;Acc:HGNC:21604]                                                                |
| ENSG00000196588 | MKL1    | 2,417129 | megakaryoblastic leukemia (translocation) 1 [Source:HGNC Symbol;Acc:HGNC:14334]                            |
| ENSG00000213923 | CSNK1E  | 2,395432 | casein kinase 1 epsilon [Source:HGNC Symbol;Acc:HGNC:2453]                                                 |
| ENSG00000112078 | KCTD20  | 2,391365 | potassium channel tetramerization domain containing 20 [Source:HGNC Symbol;Acc:HGNC:21052]                 |
| ENSG00000123159 | GIPC1   | 2,391234 | GIPC PDZ domain containing family member 1 [Source:HGNC Symbol;Acc:HGNC:1226]                              |
| ENSG00000143498 | TAF1A   | -2,38313 | TATA-box binding protein associated factor, RNA polymerase I subunit A [Source:HGNC Symbol;Acc:HGNC:11532] |
| ENSG00000156639 | ZFAND3  | 2,373954 | zinc finger AN1-type containing 3 [Source:HGNC Symbol;Acc:HGNC:18019]                                      |
| ENSG00000104960 | PTOV1   | 2,369452 | prostate tumor overexpressed 1 [Source:HGNC Symbol;Acc:HGNC:9632]                                          |
| ENSG00000141551 | CSNK1D  | 2,351336 | casein kinase 1 delta [Source:HGNC Symbol;Acc:HGNC:2452]                                                   |
| ENSG00000135932 | CAB39   | 2,351296 | calcium binding protein 39 [Source:HGNC Symbol;Acc:HGNC:20292]                                             |
| ENSG00000119929 | CUTC    | -2,32744 | cutC copper transporter [Source:HGNC Symbol;Acc:HGNC:24271]                                                |
| ENSG00000131408 | NR1H2   | 2,32513  | nuclear receptor subfamily 1 group H member 2 [Source:HGNC Symbol;Acc:HGNC:7965]                           |
| ENSG00000130511 | SSBP4   | 2,317372 | single stranded DNA binding protein 4 [Source:HGNC Symbol;Acc:HGNC:15676]                                  |
| ENSG00000062598 | ELMO2   | 2,314481 | engulfment and cell motility 2 [Source:HGNC Symbol;Acc:HGNC:17233]                                         |
| ENSG00000163376 | KBTBD8  | -2,31382 | kelch repeat and BTB domain containing 8 [Source:HGNC Symbol;Acc:HGNC:30691]                               |
| ENSG00000177565 | TBL1XR1 | 2,304209 | transducin beta like 1 X-linked receptor 1 [Source:HGNC Symbol;Acc:HGNC:29529]                             |
| ENSG00000172995 | ARPP21  | 2,300644 | cAMP regulated phosphoprotein 21 [Source:HGNC Symbol;Acc:HGNC:16968]                                       |
| ENSG00000055917 | PUM2    | 2,299191 | pumilio RNA binding family member 2 [Source:HGNC Symbol;Acc:HGNC:14958]                                    |
| ENSG00000138814 | PPP3CA  | 2,288783 | protein phosphatase 3 catalytic subunit alpha [Source:HGNC Symbol;Acc:HGNC:9314]                           |



|                 |          |          |                                                                                       |
|-----------------|----------|----------|---------------------------------------------------------------------------------------|
| ENSG00000149091 | DGKZ     | 2,28256  | diacylglycerol kinase zeta [Source:HGNC Symbol;Acc:HGNC:2857]                         |
| ENSG00000090372 | STRN4    | 2,275145 | striatin 4 [Source:HGNC Symbol;Acc:HGNC:15721]                                        |
| ENSG00000198909 | MAP3K3   | 2,263167 | mitogen-activated protein kinase kinase kinase 3 [Source:HGNC Symbol;Acc:HGNC:6855]   |
| ENSG00000100241 | SBF1     | 2,26085  | SET binding factor 1 [Source:HGNC Symbol;Acc:HGNC:10542]                              |
| ENSG00000158985 | CDC42SE2 | 2,25784  | CDC42 small effector 2 [Source:HGNC Symbol;Acc:HGNC:18547]                            |
| ENSG00000065491 | TBC1D22B | 2,252824 | TBC1 domain family member 22B [Source:HGNC Symbol;Acc:HGNC:21602]                     |
| ENSG00000087274 | ADD1     | 2,250897 | adducin 1 [Source:HGNC Symbol;Acc:HGNC:243]                                           |
| ENSG00000129911 | KLF16    | 2,245994 | Kruppel like factor 16 [Source:HGNC Symbol;Acc:HGNC:16857]                            |
| ENSG00000120063 | GNA13    | 2,24276  | G protein subunit alpha 13 [Source:HGNC Symbol;Acc:HGNC:4381]                         |
| ENSG00000124151 | NCOA3    | 2,240209 | nuclear receptor coactivator 3 [Source:HGNC Symbol;Acc:HGNC:7670]                     |
| ENSG00000138594 | TMOD3    | 2,220182 | tropomodulin 3 [Source:HGNC Symbol;Acc:HGNC:11873]                                    |
| ENSG00000157014 | TATDN2   | 2,218306 | TatD DNase domain containing 2 [Source:HGNC Symbol;Acc:HGNC:28988]                    |
| ENSG00000172081 | MOB3A    | 2,218104 | MOB kinase activator 3A [Source:HGNC Symbol;Acc:HGNC:29802]                           |
| ENSG00000163466 | ARPC2    | 2,216147 | actin related protein 2/3 complex subunit 2 [Source:HGNC Symbol;Acc:HGNC:705]         |
| ENSG00000167323 | STIM1    | 2,213045 | stromal interaction molecule 1 [Source:HGNC Symbol;Acc:HGNC:11386]                    |
| ENSG00000125249 | RAP2A    | 2,208114 | RAP2A, member of RAS oncogene family [Source:HGNC Symbol;Acc:HGNC:9861]               |
| ENSG00000166068 | SPRED1   | 2,207657 | sprouty related EVH1 domain containing 1 [Source:HGNC Symbol;Acc:HGNC:20249]          |
| ENSG00000149212 | SESN3    | 2,207497 | sestrin 3 [Source:HGNC Symbol;Acc:HGNC:23060]                                         |
| ENSG00000105647 | PIK3R2   | 2,205978 | phosphoinositide-3-kinase regulatory subunit 2 [Source:HGNC Symbol;Acc:HGNC:8980]     |
| ENSG00000130045 | NXNL2    | -2,20034 | nucleoredoxin-like 2 [Source:HGNC Symbol;Acc:HGNC:30482]                              |
| ENSG00000105325 | FZR1     | 2,190648 | fizzy and cell division cycle 20 related 1 [Source:HGNC Symbol;Acc:HGNC:24824]        |
| ENSG00000123143 | PKN1     | 2,190442 | protein kinase N1 [Source:HGNC Symbol;Acc:HGNC:9405]                                  |
| ENSG00000172575 | RASGRP1  | 2,185034 | RAS guanyl releasing protein 1 [Source:HGNC Symbol;Acc:HGNC:9878]                     |
| ENSG00000119383 | PTPA     | 2,181049 | protein phosphatase 2 phosphatase activator [Source:HGNC Symbol;Acc:HGNC:9308]        |
| ENSG00000107263 | RAPGEF1  | 2,180999 | Rap guanine nucleotide exchange factor 1 [Source:HGNC Symbol;Acc:HGNC:4568]           |
| ENSG00000160445 | ZER1     | 2,174187 | zyg-11 related cell cycle regulator [Source:HGNC Symbol;Acc:HGNC:30960]               |
| ENSG00000149483 | TMEM138  | -2,17138 | transmembrane protein 138 [Source:HGNC Symbol;Acc:HGNC:26944]                         |
| ENSG00000112664 | NA       | 2,171116 | NA                                                                                    |
| ENSG00000175416 | CLTB     | 2,164399 | clathrin light chain B [Source:HGNC Symbol;Acc:HGNC:2091]                             |
| ENSG00000196821 | C6orf106 | 2,164271 | chromosome 6 open reading frame 106 [Source:HGNC Symbol;Acc:HGNC:21215]               |
| ENSG00000126214 | KLC1     | 2,141003 | kinesin light chain 1 [Source:HGNC Symbol;Acc:HGNC:6387]                              |
| ENSG00000196961 | AP2A1    | 2,1407   | adaptor related protein complex 2 alpha 1 subunit [Source:HGNC Symbol;Acc:HGNC:561]   |
| ENSG00000155903 | RASA2    | 2,140517 | RAS p21 protein activator 2 [Source:HGNC Symbol;Acc:HGNC:9872]                        |
| ENSG00000134996 | OSTF1    | 2,138074 | osteoclast stimulating factor 1 [Source:HGNC Symbol;Acc:HGNC:8510]                    |
| ENSG00000167264 | DUS2     | -2,13716 | dihydrouridine synthase 2 [Source:HGNC Symbol;Acc:HGNC:26014]                         |
| ENSG00000120899 | PTK2B    | 2,132218 | protein tyrosine kinase 2 beta [Source:HGNC Symbol;Acc:HGNC:9612]                     |
| ENSG00000154001 | PPP2R5E  | 2,131273 | protein phosphatase 2 regulatory subunit B'epsilon [Source:HGNC Symbol;Acc:HGNC:9313] |

|                 |        |          |                                                                     |
|-----------------|--------|----------|---------------------------------------------------------------------|
| ENSG00000071051 | NCK2   | 2,126936 | NCK adaptor protein 2 [Source:HGNC Symbol;Acc:HGNC:7665]            |
| ENSG00000101940 | WDR13  | 2,120402 | WD repeat domain 13 [Source:HGNC Symbol;Acc:HGNC:14352]             |
| ENSG00000182979 | MTA1   | 2,117818 | metastasis associated 1 [Source:HGNC Symbol;Acc:HGNC:7410]          |
| ENSG00000127220 | ABHD8  | 2,117654 | abhydrolase domain containing 8 [Source:HGNC Symbol;Acc:HGNC:23759] |
| ENSG00000130544 | ZNF557 | -2,11487 | zinc finger protein 557 [Source:HGNC Symbol;Acc:HGNC:28632]         |
| ENSG00000134343 | ANO3   | 2,109273 | anoctamin 3 [Source:HGNC Symbol;Acc:HGNC:14004]                     |

**Biological theme:****Gene sets:****Metabolism and adipositas**

Reduced female fertility (MP)

Prolonged estrous cycle (MP)

Increased percent body fat (MP)

Abnormal osteoclast differentiation (MP)

| Ensembl gene ID | Gene      | Weighted mean z -score | Description                                                                            |
|-----------------|-----------|------------------------|----------------------------------------------------------------------------------------|
| ENSG00000166819 | PLIN1     | 4,700457               | perilipin 1 [Source:HGNC Symbol;Acc:HGNC:9076]                                         |
| ENSG00000123612 | ACVR1C    | 3,520797               | activin A receptor type 1C [Source:HGNC Symbol;Acc:HGNC:18123]                         |
| ENSG00000196616 | ADH1B     | 3,472607               | alcohol dehydrogenase 1B (class I), beta polypeptide [Source:HGNC Symbol;Acc:HGNC:250] |
| ENSG00000134531 | EMP1      | 3,321761               | epithelial membrane protein 1 [Source:HGNC Symbol;Acc:HGNC:3333]                       |
| ENSG00000187288 | CIDEC     | 3,313229               | cell death inducing DFFA like effector c [Source:HGNC Symbol;Acc:HGNC:24229]           |
| ENSG00000137331 | IER3      | 3,177386               | immediate early response 3 [Source:HGNC Symbol;Acc:HGNC:5392]                          |
| ENSG00000157150 | TIMP4     | 3,163388               | TIMP metalloproteinase inhibitor 4 [Source:HGNC Symbol;Acc:HGNC:11823]                 |
| ENSG00000128342 | LIF       | 3,132582               | LIF, interleukin 6 family cytokine [Source:HGNC Symbol;Acc:HGNC:6596]                  |
| ENSG00000170323 | FABP4     | 3,127135               | fatty acid binding protein 4 [Source:HGNC Symbol;Acc:HGNC:3559]                        |
| ENSG00000138061 | CYP1B1    | 3,117281               | cytochrome P450 family 1 subfamily B member 1 [Source:HGNC Symbol;Acc:HGNC:2597]       |
| ENSG00000181092 | ADIPOQ    | 3,048448               | adiponectin, C1Q and collagen domain containing [Source:HGNC Symbol;Acc:HGNC:13633]    |
| ENSG00000175445 | LPL       | 3,034297               | lipoprotein lipase [Source:HGNC Symbol;Acc:HGNC:6677]                                  |
| ENSG00000108702 | CCL1      | 3,033223               | C-C motif chemokine ligand 1 [Source:HGNC Symbol;Acc:HGNC:10609]                       |
| ENSG00000144802 | NFKBIZ    | 3,023706               | NFKB inhibitor zeta [Source:HGNC Symbol;Acc:HGNC:29805]                                |
| ENSG00000185022 | MAFF      | 3,018438               | MAF bZIP transcription factor F [Source:HGNC Symbol;Acc:HGNC:6780]                     |
| ENSG00000167676 | PLIN4     | 2,972947               | perilipin 4 [Source:HGNC Symbol;Acc:HGNC:29393]                                        |
| ENSG00000079435 | LIPE      | 2,953482               | lipase E, hormone sensitive type [Source:HGNC Symbol;Acc:HGNC:6621]                    |
| ENSG00000233093 | LINC00892 | 2,937532               | long intergenic non-protein coding RNA 892 [Source:HGNC Symbol;Acc:HGNC:48578]         |
| ENSG00000173198 | CYSLTR1   | 2,902014               | cysteinyl leukotriene receptor 1 [Source:HGNC Symbol;Acc:HGNC:17451]                   |
| ENSG00000184371 | CSF1      | 2,900313               | colony stimulating factor 1 [Source:HGNC Symbol;Acc:HGNC:2432]                         |
| ENSG00000133317 | LGALS12   | 2,884047               | galectin 12 [Source:HGNC Symbol;Acc:HGNC:15788]                                        |
| ENSG00000112964 | GHR       | 2,875365               | growth hormone receptor [Source:HGNC Symbol;Acc:HGNC:4263]                             |
| ENSG00000124253 | PCK1      | 2,863389               | phosphoenolpyruvate carboxykinase 1 [Source:HGNC Symbol;Acc:HGNC:8724]                 |
| ENSG00000221869 | CEBPD     | 2,851151               | CCAAT/enhancer binding protein delta [Source:HGNC Symbol;Acc:HGNC:1835]                |
| ENSG00000159388 | BTG2      | 2,844363               | BTG anti-proliferation factor 2 [Source:HGNC Symbol;Acc:HGNC:1131]                     |
| ENSG00000100906 | NFKBIA    | 2,812245               | NFKB inhibitor alpha [Source:HGNC Symbol;Acc:HGNC:7797]                                |
| ENSG00000113389 | NPR3      | 2,805784               | natriuretic peptide receptor 3 [Source:HGNC Symbol;Acc:HGNC:7945]                      |
| ENSG00000073756 | PTGS2     | 2,800178               | prostaglandin-endoperoxide synthase 2 [Source:HGNC Symbol;Acc:HGNC:9605]               |
| ENSG00000169194 | IL13      | 2,763667               | interleukin 13 [Source:HGNC Symbol;Acc:HGNC:5973]                                      |
| ENSG00000167588 | GPD1      | 2,761998               | glycerol-3-phosphate dehydrogenase 1 [Source:HGNC Symbol;Acc:HGNC:4455]                |

|                 |          |          |                                                                                               |
|-----------------|----------|----------|-----------------------------------------------------------------------------------------------|
| ENSG00000138207 | RBP4     | 2,751194 | retinol binding protein 4 [Source:HGNC Symbol;Acc:HGNC:9922]                                  |
| ENSG00000104043 | ATP8B4   | 2,749891 | ATPase phospholipid transporting 8B4 (putative) [Source:HGNC Symbol;Acc:HGNC:13536]           |
| ENSG00000169429 | CXCL8    | 2,721233 | C-X-C motif chemokine ligand 8 [Source:HGNC Symbol;Acc:HGNC:6025]                             |
| ENSG00000176194 | CIDEA    | 2,718866 | cell death-inducing DFFA-like effector a [Source:HGNC Symbol;Acc:HGNC:1976]                   |
| ENSG00000178789 | CD300LB  | 2,714743 | CD300 molecule like family member b [Source:HGNC Symbol;Acc:HGNC:30811]                       |
| ENSG00000108960 | MMD      | 2,702595 | monocyte to macrophage differentiation associated [Source:HGNC Symbol;Acc:HGNC:7153]          |
| ENSG00000116711 | PLA2G4A  | 2,698043 | phospholipase A2 group IVA [Source:HGNC Symbol;Acc:HGNC:9035]                                 |
| ENSG00000119508 | NR4A3    | 2,686126 | nuclear receptor subfamily 4 group A member 3 [Source:HGNC Symbol;Acc:HGNC:7982]              |
| ENSG00000101938 | CHRD1    | 2,685505 | chordin like 1 [Source:HGNC Symbol;Acc:HGNC:29861]                                            |
| ENSG00000148339 | SLC25A25 | 2,680769 | solute carrier family 25 member 25 [Source:HGNC Symbol;Acc:HGNC:20663]                        |
| ENSG00000108551 | RASD1    | 2,674321 | ras related dexamethasone induced 1 [Source:HGNC Symbol;Acc:HGNC:15828]                       |
| ENSG00000135218 | CD36     | 2,64047  | CD36 molecule [Source:HGNC Symbol;Acc:HGNC:1663]                                              |
| ENSG00000164949 | GEM      | 2,637479 | GTP binding protein overexpressed in skeletal muscle [Source:HGNC Symbol;Acc:HGNC:4234]       |
| ENSG00000125740 | FOSB     | 2,636002 | FosB proto-oncogene, AP-1 transcription factor subunit [Source:HGNC Symbol;Acc:HGNC:3797]     |
| ENSG00000128016 | ZFP36    | 2,623423 | ZFP36 ring finger protein [Source:HGNC Symbol;Acc:HGNC:12862]                                 |
| ENSG00000050628 | PTGER3   | 2,600438 | prostaglandin E receptor 3 [Source:HGNC Symbol;Acc:HGNC:9595]                                 |
| ENSG00000138135 | CH25H    | 2,598787 | cholesterol 25-hydroxylase [Source:HGNC Symbol;Acc:HGNC:1907]                                 |
| ENSG00000171223 | JUNB     | 2,584347 | JunB proto-oncogene, AP-1 transcription factor subunit [Source:HGNC Symbol;Acc:HGNC:6205]     |
| ENSG00000184811 | TUSC5    | 2,578702 | tumor suppressor candidate 5 [Source:HGNC Symbol;Acc:HGNC:29592]                              |
| ENSG00000137462 | TLR2     | 2,569844 | toll like receptor 2 [Source:HGNC Symbol;Acc:HGNC:11848]                                      |
| ENSG00000188783 | PRELP    | 2,559681 | proline and arginine rich end leucine rich repeat protein [Source:HGNC Symbol;Acc:HGNC:9357]  |
| ENSG00000105825 | TFPI2    | 2,55553  | tissue factor pathway inhibitor 2 [Source:HGNC Symbol;Acc:HGNC:11761]                         |
| ENSG00000164400 | CSF2     | 2,546836 | colony stimulating factor 2 [Source:HGNC Symbol;Acc:HGNC:2434]                                |
| ENSG00000197766 | CFD      | 2,544783 | complement factor D [Source:HGNC Symbol;Acc:HGNC:2771]                                        |
| ENSG00000081041 | CXCL2    | 2,534    | C-X-C motif chemokine ligand 2 [Source:HGNC Symbol;Acc:HGNC:4603]                             |
| ENSG00000163734 | CXCL3    | 2,530983 | C-X-C motif chemokine ligand 3 [Source:HGNC Symbol;Acc:HGNC:4604]                             |
| ENSG00000106823 | ECM2     | 2,527061 | extracellular matrix protein 2 [Source:HGNC Symbol;Acc:HGNC:3154]                             |
| ENSG00000130876 | SLC7A10  | 2,523413 | solute carrier family 7 member 10 [Source:HGNC Symbol;Acc:HGNC:11058]                         |
| ENSG00000069702 | TGFBR3   | 2,516274 | transforming growth factor beta receptor 3 [Source:HGNC Symbol;Acc:HGNC:11774]                |
| ENSG00000143507 | DUSP10   | 2,488437 | dual specificity phosphatase 10 [Source:HGNC Symbol;Acc:HGNC:3065]                            |
| ENSG00000120738 | EGR1     | 2,478584 | early growth response 1 [Source:HGNC Symbol;Acc:HGNC:3238]                                    |
| ENSG00000129596 | CDO1     | 2,475957 | cysteine dioxygenase type 1 [Source:HGNC Symbol;Acc:HGNC:1795]                                |
| ENSG00000163823 | CCR1     | 2,470725 | C-C motif chemokine receptor 1 [Source:HGNC Symbol;Acc:HGNC:1602]                             |
| ENSG00000118515 | SGK1     | 2,460405 | serum/glucocorticoid regulated kinase 1 [Source:HGNC Symbol;Acc:HGNC:10810]                   |
| ENSG00000106178 | CCL24    | 2,458166 | C-C motif chemokine ligand 24 [Source:HGNC Symbol;Acc:HGNC:10623]                             |
| ENSG00000123243 | ITIH5    | 2,449515 | inter-alpha-trypsin inhibitor heavy chain family member 5 [Source:HGNC Symbol;Acc:HGNC:21449] |
| ENSG00000108688 | CCL7     | 2,449285 | C-C motif chemokine ligand 7 [Source:HGNC Symbol;Acc:HGNC:10634]                              |

|                 |           |          |                                                                                                      |
|-----------------|-----------|----------|------------------------------------------------------------------------------------------------------|
| ENSG00000163874 | ZC3H12A   | 2,448402 | zinc finger CCCH-type containing 12A [Source:HGNC Symbol;Acc:HGNC:26259]                             |
| ENSG00000136826 | KLF4      | 2,441602 | Kruppel like factor 4 [Source:HGNC Symbol;Acc:HGNC:6348]                                             |
| ENSG00000056998 | GYG2      | 2,441546 | glycogenin 2 [Source:HGNC Symbol;Acc:HGNC:4700]                                                      |
| ENSG00000134070 | IRAK2     | 2,42997  | interleukin 1 receptor associated kinase 2 [Source:HGNC Symbol;Acc:HGNC:6113]                        |
| ENSG00000196917 | HCAR1     | 2,425992 | hydroxycarboxylic acid receptor 1 [Source:HGNC Symbol;Acc:HGNC:4532]                                 |
| ENSG00000158691 | ZSCAN12   | -2,42346 | zinc finger and SCAN domain containing 12 [Source:HGNC Symbol;Acc:HGNC:13172]                        |
| ENSG00000158571 | PFKFB1    | 2,394879 | 6-phosphofructo-2-kinase/fructose-2,6-biphosphatase 1 [Source:HGNC Symbol;Acc:HGNC:8872]             |
| ENSG00000102760 | RGCC      | 2,393504 | regulator of cell cycle [Source:HGNC Symbol;Acc:HGNC:20369]                                          |
| ENSG00000173114 | LRRN3     | 2,39204  | leucine rich repeat neuronal 3 [Source:HGNC Symbol;Acc:HGNC:17200]                                   |
| ENSG00000162772 | ATF3      | 2,390251 | activating transcription factor 3 [Source:HGNC Symbol;Acc:HGNC:785]                                  |
| ENSG00000170525 | PFKFB3    | 2,39     | 6-phosphofructo-2-kinase/fructose-2,6-biphosphatase 3 [Source:HGNC Symbol;Acc:HGNC:8874]             |
| ENSG00000184601 | C14orf180 | 2,389943 | chromosome 14 open reading frame 180 [Source:HGNC Symbol;Acc:HGNC:33795]                             |
| ENSG00000177666 | PNPLA2    | 2,38564  | patatin like phospholipase domain containing 2 [Source:HGNC Symbol;Acc:HGNC:30802]                   |
| ENSG00000127955 | GNAI1     | 2,377172 | G protein subunit alpha i1 [Source:HGNC Symbol;Acc:HGNC:4384]                                        |
| ENSG00000153234 | NR4A2     | 2,35997  | nuclear receptor subfamily 4 group A member 2 [Source:HGNC Symbol;Acc:HGNC:7981]                     |
| ENSG00000107104 | KANK1     | 2,359699 | KN motif and ankyrin repeat domains 1 [Source:HGNC Symbol;Acc:HGNC:19309]                            |
| ENSG00000106809 | OGN       | 2,359074 | osteoglycin [Source:HGNC Symbol;Acc:HGNC:8126]                                                       |
| ENSG00000113520 | IL4       | 2,358315 | interleukin 4 [Source:HGNC Symbol;Acc:HGNC:6014]                                                     |
| ENSG00000152315 | KCNK13    | 2,35296  | potassium two pore domain channel subfamily K member 13 [Source:HGNC Symbol;Acc:HGNC:6275]           |
| ENSG00000164129 | NPY5R     | 2,339855 | neuropeptide Y receptor Y5 [Source:HGNC Symbol;Acc:HGNC:7958]                                        |
| ENSG00000028137 | TNFRSF1B  | 2,338504 | TNF receptor superfamily member 1B [Source:HGNC Symbol;Acc:HGNC:11917]                               |
| ENSG00000107968 | MAP3K8    | 2,336486 | mitogen-activated protein kinase kinase kinase 8 [Source:HGNC Symbol;Acc:HGNC:6860]                  |
| ENSG00000151090 | THRB      | 2,331705 | thyroid hormone receptor beta [Source:HGNC Symbol;Acc:HGNC:11799]                                    |
| ENSG00000134107 | BHLHE40   | 2,329507 | basic helix-loop-helix family member e40 [Source:HGNC Symbol;Acc:HGNC:1046]                          |
| ENSG00000115009 | CCL20     | 2,320541 | C-C motif chemokine ligand 20 [Source:HGNC Symbol;Acc:HGNC:10619]                                    |
| ENSG00000152270 | PDE3B     | 2,31417  | phosphodiesterase 3B [Source:HGNC Symbol;Acc:HGNC:8779]                                              |
| ENSG00000173846 | PLK3      | 2,308781 | polo like kinase 3 [Source:HGNC Symbol;Acc:HGNC:2154]                                                |
| ENSG00000135447 | PPP1R1A   | 2,305536 | protein phosphatase 1 regulatory inhibitor subunit 1A [Source:HGNC Symbol;Acc:HGNC:9286]             |
| ENSG00000184557 | SOCS3     | 2,30321  | suppressor of cytokine signaling 3 [Source:HGNC Symbol;Acc:HGNC:19391]                               |
| ENSG00000171659 | GPR34     | 2,297329 | G protein-coupled receptor 34 [Source:HGNC Symbol;Acc:HGNC:4490]                                     |
| ENSG00000170458 | CD14      | 2,296518 | CD14 molecule [Source:HGNC Symbol;Acc:HGNC:1628]                                                     |
| ENSG00000125735 | TNFSF14   | 2,2948   | TNF superfamily member 14 [Source:HGNC Symbol;Acc:HGNC:11930]                                        |
| ENSG00000119121 | TRPM6     | 2,271932 | transient receptor potential cation channel subfamily M member 6 [Source:HGNC Symbol;Acc:HGNC:17995] |

**Biological theme:****Signaling by EGFR****Gene sets:**

PLCG1 events in ERBB2 signaling (Reactome)

EGFR interacts with PLCG1 (Reactome)

DAG and IP3 signaling (Reactome)

| Ensembl gene ID | Gene      | Weighted mean z -score | Description                                                                             |
|-----------------|-----------|------------------------|-----------------------------------------------------------------------------------------|
| ENSG00000249601 | LINC01187 | 4,38077                | long intergenic non-protein coding RNA 1187 [Source:HGNC Symbol;Acc:HGNC:49575]         |
| ENSG00000184908 | CLCNKB    | 4,217502               | chloride voltage-gated channel Kb [Source:HGNC Symbol;Acc:HGNC:2027]                    |
| ENSG00000161381 | PLXDC1    | 4,123238               | plexin domain containing 1 [Source:HGNC Symbol;Acc:HGNC:20945]                          |
| ENSG00000182732 | RGS6      | 3,990554               | regulator of G protein signaling 6 [Source:HGNC Symbol;Acc:HGNC:10002]                  |
| ENSG00000114861 | FOXP1     | 3,943525               | forkhead box P1 [Source:HGNC Symbol;Acc:HGNC:3823]                                      |
| ENSG00000086159 | AQP6      | 3,9232                 | aquaporin 6 [Source:HGNC Symbol;Acc:HGNC:639]                                           |
| ENSG00000152642 | GPD1L     | 3,915456               | glycerol-3-phosphate dehydrogenase 1-like [Source:HGNC Symbol;Acc:HGNC:28956]           |
| ENSG00000124772 | CPNE5     | 3,894899               | copine 5 [Source:HGNC Symbol;Acc:HGNC:2318]                                             |
| ENSG00000154146 | NRGN      | 3,884946               | neurogranin [Source:HGNC Symbol;Acc:HGNC:8000]                                          |
| ENSG00000168269 | FOXI1     | 3,882321               | forkhead box I1 [Source:HGNC Symbol;Acc:HGNC:3815]                                      |
| ENSG00000143473 | KCNH1     | 3,876158               | potassium voltage-gated channel subfamily H member 1 [Source:HGNC Symbol;Acc:HGNC:6250] |
| ENSG00000123612 | ACVR1C    | 3,843504               | activin A receptor type 1C [Source:HGNC Symbol;Acc:HGNC:18123]                          |
| ENSG00000183146 | PRORY     | 3,694305               | proline rich, Y-linked [Source:HGNC Symbol;Acc:HGNC:38732]                              |
| ENSG00000078687 | TNRC6C    | 3,687856               | trinucleotide repeat containing 6C [Source:HGNC Symbol;Acc:HGNC:29318]                  |
| ENSG00000184845 | DRD1      | 3,654582               | dopamine receptor D1 [Source:HGNC Symbol;Acc:HGNC:3020]                                 |
| ENSG00000065989 | PDE4A     | 3,65352                | phosphodiesterase 4A [Source:HGNC Symbol;Acc:HGNC:8780]                                 |
| ENSG00000151418 | ATP6V1G3  | 3,640113               | ATPase H <sup>+</sup> transporting V1 subunit G3 [Source:HGNC Symbol;Acc:HGNC:18265]    |
| ENSG00000183454 | GRIN2A    | 3,616126               | glutamate ionotropic receptor NMDA type subunit 2A [Source:HGNC Symbol;Acc:HGNC:4585]   |
| ENSG00000144596 | GRIP2     | 3,575832               | glutamate receptor interacting protein 2 [Source:HGNC Symbol;Acc:HGNC:23841]            |
| ENSG00000231249 | ITPR1-AS1 | 3,547294               | ITPR1 antisense RNA 1 (head to head) [Source:HGNC Symbol;Acc:HGNC:44470]                |
| ENSG00000083720 | OXCT1     | 3,544402               | 3-oxoacid CoA-transferase 1 [Source:HGNC Symbol;Acc:HGNC:8527]                          |
| ENSG00000167693 | NXN       | -3,53507               | nucleoredoxin [Source:HGNC Symbol;Acc:HGNC:18008]                                       |
| ENSG00000137207 | YIPF3     | -3,50762               | Yip1 domain family member 3 [Source:HGNC Symbol;Acc:HGNC:21023]                         |
| ENSG00000153012 | LGI2      | 3,48333                | leucine rich repeat LGI family member 2 [Source:HGNC Symbol;Acc:HGNC:18710]             |
| ENSG00000243627 |           | 3,476747               |                                                                                         |
| ENSG00000181656 | GPR88     | 3,469888               | G protein-coupled receptor 88 [Source:HGNC Symbol;Acc:HGNC:4539]                        |
| ENSG00000123119 | NECAB1    | 3,4643                 | N-terminal EF-hand calcium binding protein 1 [Source:HGNC Symbol;Acc:HGNC:20983]        |
| ENSG00000131067 | GGT7      | 3,460942               | gamma-glutamyltransferase 7 [Source:HGNC Symbol;Acc:HGNC:4259]                          |
| ENSG00000137486 | ARRB1     | 3,451354               | arrestin beta 1 [Source:HGNC Symbol;Acc:HGNC:711]                                       |
| ENSG00000178567 | EPM2AIP1  | 3,423901               | EPM2A interacting protein 1 [Source:HGNC Symbol;Acc:HGNC:19735]                         |
| ENSG00000175471 | MCTP1     | 3,380028               | multiple C2 and transmembrane domain containing 1 [Source:HGNC Symbol;Acc:HGNC:26183]   |

|                 |           |          |                                                                                                 |
|-----------------|-----------|----------|-------------------------------------------------------------------------------------------------|
| ENSG00000109158 | GABRA4    | 3,370186 | gamma-aminobutyric acid type A receptor alpha4 subunit [Source:HGNC Symbol;Acc:HGNC:4078]       |
| ENSG00000164076 | CAMKV     | 3,352136 | CaM kinase like vesicle associated [Source:HGNC Symbol;Acc:HGNC:28788]                          |
| ENSG00000248550 | OTX2-AS1  | -3,34859 | OTX2 antisense RNA 1 (head to head) [Source:HGNC Symbol;Acc:HGNC:43906]                         |
| ENSG00000117868 | ESYT2     | 3,339913 | extended synaptotagmin 2 [Source:HGNC Symbol;Acc:HGNC:22211]                                    |
| ENSG00000150672 | DLG2      | 3,334791 | discs large MAGUK scaffold protein 2 [Source:HGNC Symbol;Acc:HGNC:2901]                         |
| ENSG00000187800 | PEAR1     | 3,331669 | platelet endothelial aggregation receptor 1 [Source:HGNC Symbol;Acc:HGNC:33631]                 |
| ENSG00000186479 | RGS7BP    | 3,329693 | regulator of G protein signaling 7 binding protein [Source:HGNC Symbol;Acc:HGNC:23271]          |
| ENSG00000185133 | INPP5J    | 3,327221 | inositol polyphosphate-5-phosphatase J [Source:HGNC Symbol;Acc:HGNC:8956]                       |
| ENSG00000154016 | GRAP      | 3,323793 | GRB2-related adaptor protein [Source:HGNC Symbol;Acc:HGNC:4562]                                 |
| ENSG00000176884 | GRIN1     | 3,310171 | glutamate ionotropic receptor NMDA type subunit 1 [Source:HGNC Symbol;Acc:HGNC:4584]            |
| ENSG00000151623 | NR3C2     | 3,29812  | nuclear receptor subfamily 3 group C member 2 [Source:HGNC Symbol;Acc:HGNC:7979]                |
| ENSG00000172575 | RASGRP1   | 3,297642 | RAS guanyl releasing protein 1 [Source:HGNC Symbol;Acc:HGNC:9878]                               |
| ENSG00000172572 | PDE3A     | 3,29653  | phosphodiesterase 3A [Source:HGNC Symbol;Acc:HGNC:8778]                                         |
| ENSG00000173258 | ZNF483    | 3,28762  | zinc finger protein 483 [Source:HGNC Symbol;Acc:HGNC:23384]                                     |
| ENSG00000187527 | ATP13A5   | 3,281594 | ATPase 13A5 [Source:HGNC Symbol;Acc:HGNC:31789]                                                 |
| ENSG00000203685 | STUM      | 3,265948 | stum, mechanosensory transduction mediator homolog [Source:HGNC Symbol;Acc:HGNC:30491]          |
| ENSG00000152270 | PDE3B     | 3,253739 | phosphodiesterase 3B [Source:HGNC Symbol;Acc:HGNC:8779]                                         |
| ENSG00000249862 | NA        | -3,22401 | NA                                                                                              |
| ENSG00000137500 | CCDC90B   | -3,2125  | coiled-coil domain containing 90B [Source:HGNC Symbol;Acc:HGNC:28108]                           |
| ENSG00000175868 | CALCB     | -3,20405 | calcitonin related polypeptide beta [Source:HGNC Symbol;Acc:HGNC:1438]                          |
| ENSG00000072952 | MRVI1     | 3,190977 | murine retrovirus integration site 1 homolog [Source:HGNC Symbol;Acc:HGNC:7237]                 |
| ENSG00000110427 | KIAA1549L | 3,18682  | KIAA1549 like [Source:HGNC Symbol;Acc:HGNC:24836]                                               |
| ENSG00000177098 | SCN4B     | 3,179776 | sodium voltage-gated channel beta subunit 4 [Source:HGNC Symbol;Acc:HGNC:10592]                 |
| ENSG00000114279 | FGF12     | 3,166897 | fibroblast growth factor 12 [Source:HGNC Symbol;Acc:HGNC:3668]                                  |
| ENSG00000258343 |           | 3,158362 |                                                                                                 |
| ENSG00000162852 | CNST      | 3,148927 | consortin, connexin sorting protein [Source:HGNC Symbol;Acc:HGNC:26486]                         |
| ENSG00000150995 | ITPR1     | 3,147663 | inositol 1,4,5-trisphosphate receptor type 1 [Source:HGNC Symbol;Acc:HGNC:6180]                 |
| ENSG00000164100 | NDST3     | 3,13959  | N-deacetylase and N-sulfotransferase 3 [Source:HGNC Symbol;Acc:HGNC:7682]                       |
| ENSG00000249231 | CASC16    | 3,133528 | cancer susceptibility 16 (non-protein coding) [Source:HGNC Symbol;Acc:HGNC:48608]               |
| ENSG00000134318 | ROCK2     | 3,128455 | Rho associated coiled-coil containing protein kinase 2 [Source:HGNC Symbol;Acc:HGNC:10252]      |
| ENSG00000006638 | TBXA2R    | 3,12627  | thromboxane A2 receptor [Source:HGNC Symbol;Acc:HGNC:11608]                                     |
| ENSG00000115488 | NEU2      | 3,121715 | neuraminidase 2 [Source:HGNC Symbol;Acc:HGNC:7759]                                              |
| ENSG00000163629 | PTPN13    | -3,11982 | protein tyrosine phosphatase, non-receptor type 13 [Source:HGNC Symbol;Acc:HGNC:9646]           |
| ENSG00000138688 | KIAA1109  | 3,119247 | KIAA1109 [Source:HGNC Symbol;Acc:HGNC:26953]                                                    |
| ENSG00000090975 | PITPNM2   | 3,115216 | phosphatidylinositol transfer protein membrane associated 2 [Source:HGNC Symbol;Acc:HGNC:21044] |
| ENSG00000185924 | RTN4RL1   | 3,101151 | reticulon 4 receptor like 1 [Source:HGNC Symbol;Acc:HGNC:21329]                                 |
| ENSG00000186642 | PDE2A     | 3,100456 | phosphodiesterase 2A [Source:HGNC Symbol;Acc:HGNC:8777]                                         |

|                 |            |          |                                                                                                  |
|-----------------|------------|----------|--------------------------------------------------------------------------------------------------|
| ENSG00000171611 | PTCRA      | 3,099628 | pre T-cell antigen receptor alpha [Source:HGNC Symbol;Acc:HGNC:21290]                            |
| ENSG00000172379 | ARNT2      | 3,098058 | aryl hydrocarbon receptor nuclear translocator 2 [Source:HGNC Symbol;Acc:HGNC:16876]             |
| ENSG00000145920 | CPLX2      | 3,095933 | complexin 2 [Source:HGNC Symbol;Acc:HGNC:2310]                                                   |
| ENSG00000149639 | SOGA1      | 3,094996 | suppressor of glucose, autophagy associated 1 [Source:HGNC Symbol;Acc:HGNC:16111]                |
| ENSG00000179222 | MAGED1     | -3,09444 | MAGE family member D1 [Source:HGNC Symbol;Acc:HGNC:6813]                                         |
| ENSG00000231426 |            | -3,0931  |                                                                                                  |
| ENSG0000069966  | GNB5       | 3,079981 | G protein subunit beta 5 [Source:HGNC Symbol;Acc:HGNC:4401]                                      |
| ENSG00000102468 | HTR2A      | 3,071402 | 5-hydroxytryptamine receptor 2A [Source:HGNC Symbol;Acc:HGNC:5293]                               |
| ENSG0000025156  | HSF2       | -3,0557  | heat shock transcription factor 2 [Source:HGNC Symbol;Acc:HGNC:5225]                             |
| ENSG00000147408 | CSGALNACT1 | 3,054878 | chondroitin sulfate N-acetylgalactosaminyltransferase 1 [Source:HGNC Symbol;Acc:HGNC:24290]      |
| ENSG00000053918 | KCNQ1      | 3,053721 | potassium voltage-gated channel subfamily Q member 1 [Source:HGNC Symbol;Acc:HGNC:6294]          |
| ENSG00000197106 | SLC6A17    | 3,049477 | solute carrier family 6 member 17 [Source:HGNC Symbol;Acc:HGNC:31399]                            |
| ENSG00000168135 | KCNJ4      | 3,049114 | potassium voltage-gated channel subfamily J member 4 [Source:HGNC Symbol;Acc:HGNC:6265]          |
| ENSG00000061337 | LZTS1      | 3,048869 | leucine zipper tumor suppressor 1 [Source:HGNC Symbol;Acc:HGNC:13861]                            |
| ENSG00000259207 | ITGB3      | 3,040978 | integrin subunit beta 3 [Source:HGNC Symbol;Acc:HGNC:6156]                                       |
| ENSG00000102309 | PIN4       | -3,03536 | peptidylprolyl cis/trans isomerase, NIMA-interacting 4 [Source:HGNC Symbol;Acc:HGNC:8992]        |
| ENSG00000163491 | NEK10      | 3,032945 | NIMA related kinase 10 [Source:HGNC Symbol;Acc:HGNC:18592]                                       |
| ENSG00000101190 | TCFL5      | 3,024156 | transcription factor like 5 [Source:HGNC Symbol;Acc:HGNC:11646]                                  |
| ENSG00000157470 | FAM81A     | 3,023168 | family with sequence similarity 81 member A [Source:HGNC Symbol;Acc:HGNC:28379]                  |
| ENSG00000121057 | AKAP1      | 3,021357 | A-kinase anchoring protein 1 [Source:HGNC Symbol;Acc:HGNC:367]                                   |
| ENSG00000124215 | CDH26      | -3,01493 | cadherin 26 [Source:HGNC Symbol;Acc:HGNC:15902]                                                  |
| ENSG00000168818 | STX18      | -3,01412 | syntaxin 18 [Source:HGNC Symbol;Acc:HGNC:15942]                                                  |
| ENSG00000145911 | N4BP3      | 3,007796 | NEDD4 binding protein 3 [Source:HGNC Symbol;Acc:HGNC:29852]                                      |
| ENSG00000151693 | ASAP2      | 2,999487 | ArfGAP with SH3 domain, ankyrin repeat and PH domain 2 [Source:HGNC Symbol;Acc:HGNC:2721]        |
| ENSG00000116983 | HPCAL4     | 2,993568 | hippocalcin like 4 [Source:HGNC Symbol;Acc:HGNC:18212]                                           |
| ENSG00000152495 | CAMK4      | 2,986456 | calcium/calmodulin dependent protein kinase IV [Source:HGNC Symbol;Acc:HGNC:1464]                |
| ENSG00000134313 | KIDINS220  | 2,981868 | kinase D interacting substrate 220 [Source:HGNC Symbol;Acc:HGNC:29508]                           |
| ENSG00000156486 | KCNS2      | 2,968574 | potassium voltage-gated channel modifier subfamily S member 2 [Source:HGNC Symbol;Acc:HGNC:6301] |
| ENSG00000166352 | C11orf74   | -2,96205 | chromosome 11 open reading frame 74 [Source:HGNC Symbol;Acc:HGNC:25142]                          |
| ENSG00000106991 | ENG        | 2,956984 | endoglin [Source:HGNC Symbol;Acc:HGNC:3349]                                                      |
| ENSG00000116396 | KCNC4      | 2,94063  | potassium voltage-gated channel subfamily C member 4 [Source:HGNC Symbol;Acc:HGNC:6236]          |
| ENSG00000176009 | ASCL3      | 2,938682 | achaete-scute family bHLH transcription factor 3 [Source:HGNC Symbol;Acc:HGNC:740]               |



**Biological theme:****Gene sets:****Immune response**

Activation of immune response (GO)

Enlarged lymph nodes (MP)

TCR signaling (Reactome)

Downstream TCR signaling (Reactome)

| Ensembl gene ID | Gene     | Weighted mean z -score | Description                                                                                           |
|-----------------|----------|------------------------|-------------------------------------------------------------------------------------------------------|
| ENSG00000179344 | HLA-DQB1 | 8,794715               | major histocompatibility complex, class II, DQ beta 1 [Source:HGNC Symbol;Acc:HGNC:4944]              |
| ENSG00000231389 | HLA-DPA1 | 8,367733               | major histocompatibility complex, class II, DP alpha 1 [Source:HGNC Symbol;Acc:HGNC:4938]             |
| ENSG00000223865 | HLA-DPB1 | 8,088377               | major histocompatibility complex, class II, DP beta 1 [Source:HGNC Symbol;Acc:HGNC:4940]              |
| ENSG00000229391 | HLA-DRB6 | 7,754339               | major histocompatibility complex, class II, DR beta 6 (pseudogene) [Source:HGNC Symbol;Acc:HGNC:4954] |
| ENSG0000019582  | CD74     | 7,734311               | CD74 molecule [Source:HGNC Symbol;Acc:HGNC:1697]                                                      |
| ENSG00000196735 | HLA-DQA1 | 7,716375               | major histocompatibility complex, class II, DQ alpha 1 [Source:HGNC Symbol;Acc:HGNC:4942]             |
| ENSG00000204257 | HLA-DMA  | 7,385088               | major histocompatibility complex, class II, DM alpha [Source:HGNC Symbol;Acc:HGNC:4934]               |
| ENSG00000242574 | HLA-DMB  | 7,376177               | major histocompatibility complex, class II, DM beta [Source:HGNC Symbol;Acc:HGNC:4935]                |
| ENSG00000204287 | HLA-DRA  | 7,251499               | major histocompatibility complex, class II, DR alpha [Source:HGNC Symbol;Acc:HGNC:4947]               |
| ENSG00000196126 | HLA-DRB1 | 7,169586               | major histocompatibility complex, class II, DR beta 1 [Source:HGNC Symbol;Acc:HGNC:4948]              |
| ENSG00000179583 | CIITA    | 6,56806                | class II major histocompatibility complex transactivator [Source:HGNC Symbol;Acc:HGNC:7067]           |
| ENSG00000204252 | HLA-DOA  | 6,470649               | major histocompatibility complex, class II, DO alpha [Source:HGNC Symbol;Acc:HGNC:4936]               |
| ENSG00000232629 | HLA-DQB2 | 5,587166               | major histocompatibility complex, class II, DQ beta 2 [Source:HGNC Symbol;Acc:HGNC:4945]              |
| ENSG00000211772 | TRBC2    | 5,53476                | T-cell receptor beta constant 2 [Source:HGNC Symbol;Acc:HGNC:12157]                                   |
| ENSG00000182866 | LCK      | 5,16429                | LCK proto-oncogene, Src family tyrosine kinase [Source:HGNC Symbol;Acc:HGNC:6524]                     |
| ENSG00000116824 | CD2      | 5,151253               | CD2 molecule [Source:HGNC Symbol;Acc:HGNC:1639]                                                       |
| ENSG00000110448 | CD5      | 5,100062               | CD5 molecule [Source:HGNC Symbol;Acc:HGNC:1685]                                                       |
| ENSG00000227507 | LTB      | 5,008763               | lymphotoxin beta [Source:HGNC Symbol;Acc:HGNC:6711]                                                   |
| ENSG00000167286 | CD3D     | 4,975573               | CD3d molecule [Source:HGNC Symbol;Acc:HGNC:1673]                                                      |
| ENSG00000169442 | CD52     | 4,941539               | CD52 molecule [Source:HGNC Symbol;Acc:HGNC:1804]                                                      |
| ENSG0000013725  | CD6      | 4,939083               | CD6 molecule [Source:HGNC Symbol;Acc:HGNC:1691]                                                       |
| ENSG00000075884 | ARHGAP15 | 4,908268               | Rho GTPase activating protein 15 [Source:HGNC Symbol;Acc:HGNC:21030]                                  |
| ENSG00000198821 | CD247    | 4,863078               | CD247 molecule [Source:HGNC Symbol;Acc:HGNC:1677]                                                     |
| ENSG00000147168 | IL2RG    | 4,849608               | interleukin 2 receptor subunit gamma [Source:HGNC Symbol;Acc:HGNC:6010]                               |
| ENSG00000198851 | CD3E     | 4,811588               | CD3e molecule [Source:HGNC Symbol;Acc:HGNC:1674]                                                      |
| ENSG00000009790 | TRAF3IP3 | 4,809586               | TRAF3 interacting protein 3 [Source:HGNC Symbol;Acc:HGNC:30766]                                       |
| ENSG00000180096 | SEPT1    | 4,774373               | septin 1 [Source:HGNC Symbol;Acc:HGNC:2879]                                                           |
| ENSG00000110077 | MS4A6A   | 4,691504               | membrane spanning 4-domains A6A [Source:HGNC Symbol;Acc:HGNC:13375]                                   |
| ENSG00000229164 | NA       | 4,683413               | NA                                                                                                    |
| ENSG00000137078 | SIT1     | 4,66575                | signaling threshold regulating transmembrane adaptor 1 [Source:HGNC Symbol;Acc:HGNC:17710]            |

|                 |          |          |                                                                                                        |
|-----------------|----------|----------|--------------------------------------------------------------------------------------------------------|
| ENSG00000115085 | ZAP70    | 4,655719 | zeta chain of T-cell receptor associated protein kinase 70 [Source:HGNC Symbol;Acc:HGNC:12858]         |
| ENSG0000010610  | CD4      | 4,612142 | CD4 molecule [Source:HGNC Symbol;Acc:HGNC:1678]                                                        |
| ENSG00000113263 | ITK      | 4,601818 | IL2 inducible T-cell kinase [Source:HGNC Symbol;Acc:HGNC:6171]                                         |
| ENSG00000081237 | PTPRC    | 4,572809 | protein tyrosine phosphatase, receptor type C [Source:HGNC Symbol;Acc:HGNC:9666]                       |
| ENSG00000180353 | HCLS1    | 4,548955 | hematopoietic cell-specific Lyn substrate 1 [Source:HGNC Symbol;Acc:HGNC:4844]                         |
| ENSG00000224557 | HLA-DPB2 | 4,518237 | major histocompatibility complex, class II, DP beta 2 (pseudogene) [Source:HGNC Symbol;Acc:HGNC:4941]  |
| ENSG00000160654 | CD3G     | 4,470402 | CD3g molecule [Source:HGNC Symbol;Acc:HGNC:1675]                                                       |
| ENSG00000161570 | NA       | 4,454095 | NA                                                                                                     |
| ENSG00000089012 | SIRPG    | 4,427965 | signal regulatory protein gamma [Source:HGNC Symbol;Acc:HGNC:15757]                                    |
| ENSG00000143119 | CD53     | 4,424963 | CD53 molecule [Source:HGNC Symbol;Acc:HGNC:1686]                                                       |
| ENSG00000141293 | SKAP1    | 4,419774 | src kinase associated phosphoprotein 1 [Source:HGNC Symbol;Acc:HGNC:15605]                             |
| ENSG00000043462 | LCP2     | 4,410254 | lymphocyte cytosolic protein 2 [Source:HGNC Symbol;Acc:HGNC:6529]                                      |
| ENSG00000104894 | CD37     | 4,379604 | CD37 molecule [Source:HGNC Symbol;Acc:HGNC:1666]                                                       |
| ENSG00000082074 | FYB      | 4,375921 | FYN binding protein [Source:HGNC Symbol;Acc:HGNC:4036]                                                 |
| ENSG00000185862 | EVI2B    | 4,364709 | ecotropic viral integration site 2B [Source:HGNC Symbol;Acc:HGNC:3500]                                 |
| ENSG00000153283 | CD96     | 4,343347 | CD96 molecule [Source:HGNC Symbol;Acc:HGNC:16892]                                                      |
| ENSG00000111796 | KLRB1    | 4,330489 | killer cell lectin like receptor B1 [Source:HGNC Symbol;Acc:HGNC:6373]                                 |
| ENSG00000110031 | LPXN     | 4,32642  | leupaxin [Source:HGNC Symbol;Acc:HGNC:14061]                                                           |
| ENSG00000126264 | HCST     | 4,319963 | hematopoietic cell signal transducer [Source:HGNC Symbol;Acc:HGNC:16977]                               |
| ENSG00000100385 | IL2RB    | 4,314786 | interleukin 2 receptor subunit beta [Source:HGNC Symbol;Acc:HGNC:6009]                                 |
| ENSG00000105122 | RASAL3   | 4,267707 | RAS protein activator like 3 [Source:HGNC Symbol;Acc:HGNC:26129]                                       |
| ENSG00000160185 | UBASH3A  | 4,266742 | ubiquitin associated and SH3 domain containing A [Source:HGNC Symbol;Acc:HGNC:12462]                   |
| ENSG00000138755 | CXCL9    | 4,233919 | C-X-C motif chemokine ligand 9 [Source:HGNC Symbol;Acc:HGNC:7098]                                      |
| ENSG00000163519 | TRAT1    | 4,207095 | T-cell receptor associated transmembrane adaptor 1 [Source:HGNC Symbol;Acc:HGNC:30698]                 |
| ENSG00000123329 | ARHGAP9  | 4,204577 | Rho GTPase activating protein 9 [Source:HGNC Symbol;Acc:HGNC:14130]                                    |
| ENSG00000162894 | FCMR     | 4,196386 | Fc fragment of IgM receptor [Source:HGNC Symbol;Acc:HGNC:14315]                                        |
| ENSG00000127152 | BCL11B   | 4,194725 | B-cell CLL/lymphoma 11B [Source:HGNC Symbol;Acc:HGNC:13222]                                            |
| ENSG00000145649 | GZMA     | 4,191488 | granzyme A [Source:HGNC Symbol;Acc:HGNC:4708]                                                          |
| ENSG00000186265 | BTLA     | 4,190389 | B and T lymphocyte associated [Source:HGNC Symbol;Acc:HGNC:21087]                                      |
| ENSG00000183918 | SH2D1A   | 4,186017 | SH2 domain containing 1A [Source:HGNC Symbol;Acc:HGNC:10820]                                           |
| ENSG00000162511 | LAPTM5   | 4,119971 | lysosomal protein transmembrane 5 [Source:HGNC Symbol;Acc:HGNC:29612]                                  |
| ENSG00000179934 | CCR8     | 4,118955 | C-C motif chemokine receptor 8 [Source:HGNC Symbol;Acc:HGNC:1609]                                      |
| ENSG00000134516 | DOCK2    | 4,111048 | dedicator of cytokinesis 2 [Source:HGNC Symbol;Acc:HGNC:2988]                                          |
| ENSG00000112799 | LY86     | 4,110642 | lymphocyte antigen 86 [Source:HGNC Symbol;Acc:HGNC:16837]                                              |
| ENSG00000175463 | TBC1D10C | 4,091699 | TBC1 domain family member 10C [Source:HGNC Symbol;Acc:HGNC:24702]                                      |
| ENSG00000110848 | CD69     | 4,075173 | CD69 molecule [Source:HGNC Symbol;Acc:HGNC:1694]                                                       |
| ENSG00000231461 | HLA-DPA2 | 4,069831 | major histocompatibility complex, class II, DP alpha 2 (pseudogene) [Source:HGNC Symbol;Acc:HGNC:4939] |

|                 |          |          |                                                                                                     |
|-----------------|----------|----------|-----------------------------------------------------------------------------------------------------|
| ENSG00000174946 | GPR171   | 4,0554   | G protein-coupled receptor 171 [Source:HGNC Symbol;Acc:HGNC:30057]                                  |
| ENSG00000213402 | PTPRCAP  | 4,051938 | protein tyrosine phosphatase, receptor type C associated protein [Source:HGNC Symbol;Acc:HGNC:9667] |
| ENSG00000134242 | PTPN22   | 4,050617 | protein tyrosine phosphatase, non-receptor type 22 [Source:HGNC Symbol;Acc:HGNC:9652]               |
| ENSG00000143390 | RFX5     | 4,037235 | regulatory factor X5 [Source:HGNC Symbol;Acc:HGNC:9986]                                             |
| ENSG00000104814 | MAP4K1   | 4,037143 | mitogen-activated protein kinase kinase kinase kinase 1 [Source:HGNC Symbol;Acc:HGNC:6863]          |
| ENSG00000169413 | RNASE6   | 4,034963 | ribonuclease A family member k6 [Source:HGNC Symbol;Acc:HGNC:10048]                                 |
| ENSG00000173762 | CD7      | 4,034455 | CD7 molecule [Source:HGNC Symbol;Acc:HGNC:1695]                                                     |
| ENSG00000211899 | IGHM     | 4,032006 | immunoglobulin heavy constant mu [Source:HGNC Symbol;Acc:HGNC:5541]                                 |
| ENSG00000168421 | RHOH     | 4,031815 | ras homolog family member H [Source:HGNC Symbol;Acc:HGNC:686]                                       |
| ENSG00000148908 | RGS10    | 4,002662 | regulator of G protein signaling 10 [Source:HGNC Symbol;Acc:HGNC:9992]                              |
| ENSG00000112149 | CD83     | 4,000381 | CD83 molecule [Source:HGNC Symbol;Acc:HGNC:1703]                                                    |
| ENSG00000126353 | CCR7     | 3,976686 | C-C motif chemokine receptor 7 [Source:HGNC Symbol;Acc:HGNC:1608]                                   |
| ENSG00000162739 | SLAMF6   | 3,967657 | SLAM family member 6 [Source:HGNC Symbol;Acc:HGNC:21392]                                            |
| ENSG00000168685 | IL7R     | 3,963672 | interleukin 7 receptor [Source:HGNC Symbol;Acc:HGNC:6024]                                           |
| ENSG00000167984 | NLRC3    | 3,941012 | NLR family CARD domain containing 3 [Source:HGNC Symbol;Acc:HGNC:29889]                             |
| ENSG00000188820 | FAM26F   | 3,938207 | family with sequence similarity 26 member F [Source:HGNC Symbol;Acc:HGNC:33391]                     |
| ENSG00000211785 | TRAV12-1 | 3,906063 | T-cell receptor alpha variable 12-1 [Source:HGNC Symbol;Acc:HGNC:12105]                             |
| ENSG00000078589 | P2RY10   | 3,89986  | purinergic receptor P2Y10 [Source:HGNC Symbol;Acc:HGNC:19906]                                       |
| ENSG00000186517 | ARHGAP30 | 3,898922 | Rho GTPase activating protein 30 [Source:HGNC Symbol;Acc:HGNC:27414]                                |
| ENSG00000102879 | CORO1A   | 3,891896 | coronin 1A [Source:HGNC Symbol;Acc:HGNC:2252]                                                       |
| ENSG00000213658 | LAT      | 3,886074 | linker for activation of T-cells [Source:HGNC Symbol;Acc:HGNC:18874]                                |
| ENSG00000163600 | ICOS     | 3,883388 | inducible T-cell costimulator [Source:HGNC Symbol;Acc:HGNC:5351]                                    |
| ENSG00000115165 | CYTIP    | 3,882563 | cytohesin 1 interacting protein [Source:HGNC Symbol;Acc:HGNC:9506]                                  |
| ENSG00000136167 | LCP1     | 3,880266 | lymphocyte cytosolic protein 1 [Source:HGNC Symbol;Acc:HGNC:6528]                                   |
| ENSG00000108798 | ABI3     | 3,858397 | ABI family member 3 [Source:HGNC Symbol;Acc:HGNC:29859]                                             |
| ENSG00000072818 | ACAP1    | 3,851821 | ArfGAP with coiled-coil, ankyrin repeat and PH domains 1 [Source:HGNC Symbol;Acc:HGNC:16467]        |
| ENSG00000153563 | CD8A     | 3,81902  | CD8a molecule [Source:HGNC Symbol;Acc:HGNC:1706]                                                    |
| ENSG00000005844 | ITGAL    | 3,803476 | integrin subunit alpha L [Source:HGNC Symbol;Acc:HGNC:6148]                                         |
| ENSG00000008517 | IL32     | 3,797842 | interleukin 32 [Source:HGNC Symbol;Acc:HGNC:16830]                                                  |
| ENSG00000179144 | GIMAP7   | 3,787008 | GTPase, IMAP family member 7 [Source:HGNC Symbol;Acc:HGNC:22404]                                    |
| ENSG00000172575 | RASGRP1  | 3,784238 | RAS guanyl releasing protein 1 [Source:HGNC Symbol;Acc:HGNC:9878]                                   |
| ENSG00000180448 | ARHGAP45 | 3,771771 | Rho GTPase activating protein 45 [Source:HGNC Symbol;Acc:HGNC:17102]                                |
| ENSG00000172543 | CTSW     | 3,748069 | cathepsin W [Source:HGNC Symbol;Acc:HGNC:2546]                                                      |

**Biological theme:****Caspase cascade/apoptosis****Gene sets:**

NOD1 subnetwork (ENSG)

| Ensembl gene ID | Gene     | Weighted mean z -score | Description                                                                            |
|-----------------|----------|------------------------|----------------------------------------------------------------------------------------|
| ENSG00000132002 | DNAJB1   | 8,625188               | DnaJ heat shock protein family (Hsp40) member B1 [Source:HGNC Symbol;Acc:HGNC:5270]    |
| ENSG00000204388 | HSPA1B   | 8,296803               | heat shock protein family A (Hsp70) member 1B [Source:HGNC Symbol;Acc:HGNC:5233]       |
| ENSG00000144381 | HSPD1    | 7,757833               | heat shock protein family D (Hsp60) member 1 [Source:HGNC Symbol;Acc:HGNC:5261]        |
| ENSG00000204390 | HSPA1L   | 7,514735               | heat shock protein family A (Hsp70) member 1 like [Source:HGNC Symbol;Acc:HGNC:5234]   |
| ENSG00000120694 | HSPH1    | 7,037116               | heat shock protein family H (Hsp110) member 1 [Source:HGNC Symbol;Acc:HGNC:16969]      |
| ENSG00000204389 | HSPA1A   | 7,033475               | heat shock protein family A (Hsp70) member 1A [Source:HGNC Symbol;Acc:HGNC:5232]       |
| ENSG00000086061 | DNAJA1   | 6,953057               | DnaJ heat shock protein family (Hsp40) member A1 [Source:HGNC Symbol;Acc:HGNC:5229]    |
| ENSG00000140403 | DNAJA4   | 5,928391               | DnaJ heat shock protein family (Hsp40) member A4 [Source:HGNC Symbol;Acc:HGNC:14885]   |
| ENSG00000162616 | DNAJB4   | 5,817007               | DnaJ heat shock protein family (Hsp40) member B4 [Source:HGNC Symbol;Acc:HGNC:14886]   |
| ENSG00000168404 | MLKL     | 5,669237               | mixed lineage kinase domain like pseudokinase [Source:HGNC Symbol;Acc:HGNC:26617]      |
| ENSG00000159873 | CCDC117  | 5,634329               | coiled-coil domain containing 117 [Source:HGNC Symbol;Acc:HGNC:26599]                  |
| ENSG00000196954 | CASP4    | 5,505875               | caspase 4 [Source:HGNC Symbol;Acc:HGNC:1505]                                           |
| ENSG00000117226 | GBP3     | 5,465861               | guanylate binding protein 3 [Source:HGNC Symbol;Acc:HGNC:4184]                         |
| ENSG00000100591 | AHSA1    | 5,167707               | activator of HSP90 ATPase activity 1 [Source:HGNC Symbol;Acc:HGNC:1189]                |
| ENSG00000105939 | ZC3HAV1  | 5,077428               | zinc finger CCCH-type containing, antiviral 1 [Source:HGNC Symbol;Acc:HGNC:23721]      |
| ENSG00000160570 | DEDD2    | 5,065977               | death effector domain containing 2 [Source:HGNC Symbol;Acc:HGNC:24450]                 |
| ENSG00000235505 |          | 5,059363               |                                                                                        |
| ENSG00000110172 | CHORDC1  | 4,913954               | cysteine and histidine rich domain containing 1 [Source:HGNC Symbol;Acc:HGNC:14525]    |
| ENSG00000116161 | CACYBP   | 4,76213                | calyculin binding protein [Source:HGNC Symbol;Acc:HGNC:30423]                          |
| ENSG00000003400 | CASP10   | 4,612144               | caspase 10 [Source:HGNC Symbol;Acc:HGNC:1500]                                          |
| ENSG00000080824 | HSP90AA1 | 4,584465               | heat shock protein 90 alpha family class A member 1 [Source:HGNC Symbol;Acc:HGNC:5253] |
| ENSG00000173209 | AHSA2    | 4,557669               | activator of HSP90 ATPase homolog 2 [Source:HGNC Symbol;Acc:HGNC:20437]                |
| ENSG00000204397 | CARD16   | 4,518489               | caspase recruitment domain family member 16 [Source:HGNC Symbol;Acc:HGNC:33701]        |
| ENSG00000151929 | BAG3     | 4,404858               | BCL2 associated athanogene 3 [Source:HGNC Symbol;Acc:HGNC:939]                         |
| ENSG00000132952 | USPL1    | 4,347362               | ubiquitin specific peptidase like 1 [Source:HGNC Symbol;Acc:HGNC:20294]                |
| ENSG00000004478 | FKBP4    | 4,330958               | FK506 binding protein 4 [Source:HGNC Symbol;Acc:HGNC:3720]                             |
| ENSG00000112110 | MRPL18   | 4,313322               | mitochondrial ribosomal protein L18 [Source:HGNC Symbol;Acc:HGNC:14477]                |
| ENSG00000115541 | HSPE1    | 4,311942               | heat shock protein family E (Hsp10) member 1 [Source:HGNC Symbol;Acc:HGNC:5269]        |
| ENSG00000182359 | KBTBD3   | 4,107999               | kelch repeat and BTB domain containing 3 [Source:HGNC Symbol;Acc:HGNC:22934]           |
| ENSG00000182827 | ACBD3    | 4,068569               | acyl-CoA binding domain containing 3 [Source:HGNC Symbol;Acc:HGNC:15453]               |
| ENSG00000234127 | TRIM26   | 4,026903               | tripartite motif containing 26 [Source:HGNC Symbol;Acc:HGNC:12962]                     |
| ENSG00000112343 | TRIM38   | 4,017224               | tripartite motif containing 38 [Source:HGNC Symbol;Acc:HGNC:10059]                     |
| ENSG00000204403 | CASP12   | 4,009687               | caspase 12 (gene/pseudogene) [Source:HGNC Symbol;Acc:HGNC:19004]                       |

|                 |          |          |                                                                                                           |
|-----------------|----------|----------|-----------------------------------------------------------------------------------------------------------|
| ENSG00000188917 | TRMT2B   | 3,971682 | tRNA methyltransferase 2 homolog B [Source:HGNC Symbol;Acc:HGNC:25748]                                    |
| ENSG00000117222 | RBBP5    | 3,912675 | RB binding protein 5, histone lysine methyltransferase complex subunit [Source:HGNC Symbol;Acc:HGNC:9888] |
| ENSG00000184378 | ACTRT3   | 3,891801 | actin related protein T3 [Source:HGNC Symbol;Acc:HGNC:24022]                                              |
| ENSG00000181481 | RNF135   | 3,861298 | ring finger protein 135 [Source:HGNC Symbol;Acc:HGNC:21158]                                               |
| ENSG00000125347 | IRF1     | 3,858315 | interferon regulatory factor 1 [Source:HGNC Symbol;Acc:HGNC:6116]                                         |
| ENSG00000064012 | CASP8    | 3,853201 | caspase 8 [Source:HGNC Symbol;Acc:HGNC:1509]                                                              |
| ENSG00000178381 | ZFAND2A  | 3,819473 | zinc finger AN1-type containing 2A [Source:HGNC Symbol;Acc:HGNC:28073]                                    |
| ENSG00000096654 | ZNF184   | 3,816668 | zinc finger protein 184 [Source:HGNC Symbol;Acc:HGNC:12975]                                               |
| ENSG00000137757 | CASP5    | 3,788259 | caspase 5 [Source:HGNC Symbol;Acc:HGNC:1506]                                                              |
| ENSG00000121858 | TNFSF10  | 3,787032 | TNF superfamily member 10 [Source:HGNC Symbol;Acc:HGNC:11925]                                             |
| ENSG00000197714 | ZNF460   | 3,767548 | zinc finger protein 460 [Source:HGNC Symbol;Acc:HGNC:21628]                                               |
| ENSG00000249281 | NA       | 3,748099 | NA                                                                                                        |
| ENSG00000110852 | CLEC2B   | 3,712507 | C-type lectin domain family 2 member B [Source:HGNC Symbol;Acc:HGNC:2053]                                 |
| ENSG00000013441 | CLK1     | 3,670167 | CDC like kinase 1 [Source:HGNC Symbol;Acc:HGNC:2068]                                                      |
| ENSG00000165806 | CASP7    | 3,669723 | caspase 7 [Source:HGNC Symbol;Acc:HGNC:1508]                                                              |
| ENSG00000174130 | TLR6     | 3,658076 | toll like receptor 6 [Source:HGNC Symbol;Acc:HGNC:16711]                                                  |
| ENSG00000006625 | GGCT     | 3,649888 | gamma-glutamylcyclotransferase [Source:HGNC Symbol;Acc:HGNC:21705]                                        |
| ENSG00000183323 | CCDC125  | 3,648215 | coiled-coil domain containing 125 [Source:HGNC Symbol;Acc:HGNC:28924]                                     |
| ENSG00000206418 | RAB12    | 3,642415 | RAB12, member RAS oncogene family [Source:HGNC Symbol;Acc:HGNC:31332]                                     |
| ENSG00000137752 | CASP1    | 3,628547 | caspase 1 [Source:HGNC Symbol;Acc:HGNC:1499]                                                              |
| ENSG00000144401 | METTL21A | 3,617536 | methyltransferase like 21A [Source:HGNC Symbol;Acc:HGNC:30476]                                            |
| ENSG00000106211 | HSPB1    | 3,592471 | heat shock protein family B (small) member 1 [Source:HGNC Symbol;Acc:HGNC:5246]                           |
| ENSG00000230037 | UBBP1    | 3,591736 | ubiquitin B pseudogene 1 [Source:HGNC Symbol;Acc:HGNC:12464]                                              |
| ENSG00000237298 | TTN-AS1  | 3,587822 | TTN antisense RNA 1 [Source:HGNC Symbol;Acc:HGNC:44124]                                                   |
| ENSG00000168405 | CMAHP    | 3,584939 | cytidine monophospho-N-acetylneuraminic acid hydroxylase, pseudogene [Source:HGNC Symbol;Acc:HGNC:2098]   |
| ENSG00000110330 | BIRC2    | 3,551986 | baculoviral IAP repeat containing 2 [Source:HGNC Symbol;Acc:HGNC:590]                                     |
| ENSG00000225946 | NA       | -3,5333  | NA                                                                                                        |
| ENSG00000147852 | VLDLR    | -3,53328 | very low density lipoprotein receptor [Source:HGNC Symbol;Acc:HGNC:12698]                                 |
| ENSG00000117616 | RSRP1    | 3,522937 | arginine and serine rich protein 1 [Source:HGNC Symbol;Acc:HGNC:25234]                                    |
| ENSG00000172530 | BANP     | 3,511046 | BTG3 associated nuclear protein [Source:HGNC Symbol;Acc:HGNC:13450]                                       |
| ENSG00000164308 | ERAP2    | 3,50351  | endoplasmic reticulum aminopeptidase 2 [Source:HGNC Symbol;Acc:HGNC:29499]                                |
| ENSG00000201340 |          | -3,49244 | Y RNA [Source:RFAM;Acc:RF00019]                                                                           |
| ENSG00000172738 | TMEM217  | 3,481207 | transmembrane protein 217 [Source:HGNC Symbol;Acc:HGNC:21238]                                             |
| ENSG00000164430 | MB21D1   | 3,472955 | Mab-21 domain containing 1 [Source:HGNC Symbol;Acc:HGNC:21367]                                            |
| ENSG00000104320 | NBN      | 3,471579 | nibrin [Source:HGNC Symbol;Acc:HGNC:7652]                                                                 |
| ENSG00000007129 | CEACAM21 | 3,456471 | carcinoembryonic antigen related cell adhesion molecule 21 [Source:HGNC Symbol;Acc:HGNC:28834]            |
| ENSG00000197442 | MAP3K5   | 3,454716 | mitogen-activated protein kinase kinase kinase 5 [Source:HGNC Symbol;Acc:HGNC:6857]                       |

|                 |           |          |                                                                                                |
|-----------------|-----------|----------|------------------------------------------------------------------------------------------------|
| ENSG00000219807 | ARF1P1    | 3,450048 | ADP ribosylation factor 1 pseudogene 1 [Source:HGNC Symbol;Acc:HGNC:22500]                     |
| ENSG00000136560 | TANK      | 3,429337 | TRAF family member associated NFKB activator [Source:HGNC Symbol;Acc:HGNC:11562]               |
| ENSG00000141569 | TRIM65    | 3,427981 | tripartite motif containing 65 [Source:HGNC Symbol;Acc:HGNC:27316]                             |
| ENSG00000111371 | SLC38A1   | -3,42479 | solute carrier family 38 member 1 [Source:HGNC Symbol;Acc:HGNC:13447]                          |
| ENSG00000145365 | TIFA      | 3,418926 | TRAF interacting protein with forkhead associated domain [Source:HGNC Symbol;Acc:HGNC:19075]   |
| ENSG00000167333 | TRIM68    | 3,406361 | tripartite motif containing 68 [Source:HGNC Symbol;Acc:HGNC:21161]                             |
| ENSG00000132680 | KIAA0907  | 3,390356 | KIAA0907 [Source:HGNC Symbol;Acc:HGNC:29145]                                                   |
| ENSG00000105854 | PON2      | 3,366168 | paraoxonase 2 [Source:HGNC Symbol;Acc:HGNC:9205]                                               |
| ENSG00000187116 | LILRA5    | 3,36525  | leukocyte immunoglobulin like receptor A5 [Source:HGNC Symbol;Acc:HGNC:16309]                  |
| ENSG00000170903 | MSANTD4   | 3,362203 | Myb/SANT DNA binding domain containing 4 with coiled-coils [Source:HGNC Symbol;Acc:HGNC:29383] |
| ENSG00000026950 | BTN3A1    | 3,330896 | butyrophilin subfamily 3 member A1 [Source:HGNC Symbol;Acc:HGNC:1138]                          |
| ENSG00000189060 | H1FO      | -3,32882 | H1 histone family member 0 [Source:HGNC Symbol;Acc:HGNC:4714]                                  |
| ENSG00000131979 | GCH1      | 3,324423 | GTP cyclohydrolase 1 [Source:HGNC Symbol;Acc:HGNC:4193]                                        |
| ENSG00000123636 | BAZ2B     | 3,322775 | bromodomain adjacent to zinc finger domain 2B [Source:HGNC Symbol;Acc:HGNC:963]                |
| ENSG00000172716 | SLFN11    | 3,300881 | schlafen family member 11 [Source:HGNC Symbol;Acc:HGNC:26633]                                  |
| ENSG00000232874 |           | -3,27779 |                                                                                                |
| ENSG00000164691 | TAGAP     | 3,271943 | T-cell activation RhoGTPase activating protein [Source:HGNC Symbol;Acc:HGNC:15669]             |
| ENSG00000247624 | CPEB2-AS1 | 3,269631 | CPEB2 antisense RNA 1 (head to head) [Source:HGNC Symbol;Acc:HGNC:49082]                       |
| ENSG00000162645 | GBP2      | 3,26542  | guanylate binding protein 2 [Source:HGNC Symbol;Acc:HGNC:4183]                                 |
| ENSG00000140563 | MCTP2     | 3,263248 | multiple C2 and transmembrane domain containing 2 [Source:HGNC Symbol;Acc:HGNC:25636]          |
| ENSG00000168439 | STIP1     | 3,233948 | stress induced phosphoprotein 1 [Source:HGNC Symbol;Acc:HGNC:11387]                            |
| ENSG00000154589 | LY96      | 3,213273 | lymphocyte antigen 96 [Source:HGNC Symbol;Acc:HGNC:17156]                                      |
| ENSG00000158079 | PTPDC1    | -3,2022  | protein tyrosine phosphatase domain containing 1 [Source:HGNC Symbol;Acc:HGNC:30184]           |
| ENSG00000164729 | SLC35G3   | -3,19783 | solute carrier family 35 member G3 [Source:HGNC Symbol;Acc:HGNC:26848]                         |
| ENSG00000228247 | UBBP2     | 3,197343 | ubiquitin B pseudogene 2 [Source:HGNC Symbol;Acc:HGNC:12465]                                   |
| ENSG00000130270 | ATP8B3    | -3,19065 | ATPase phospholipid transporting 8B3 [Source:HGNC Symbol;Acc:HGNC:13535]                       |
| ENSG00000118260 | CREB1     | 3,188116 | cAMP responsive element binding protein 1 [Source:HGNC Symbol;Acc:HGNC:2345]                   |
| ENSG00000128284 | APOL3     | 3,183511 | apolipoprotein L3 [Source:HGNC Symbol;Acc:HGNC:14868]                                          |
| ENSG00000215458 | AATBC     | 3,180381 | apoptosis associated transcript in bladder cancer [Source:HGNC Symbol;Acc:HGNC:51526]          |
| ENSG00000149231 | CCDC82    | 3,180336 | coiled-coil domain containing 82 [Source:HGNC Symbol;Acc:HGNC:26282]                           |

**Biological theme:****Gene sets:****Phosphatase activity**

Phosphatase activity (GO)

Phosphoprotein phosphatase activity (GO)

Phosphoric ester hydrolase activity (GO)

| Ensembl gene ID | Gene      | Weighted mean z -score | Description                                                                                       |
|-----------------|-----------|------------------------|---------------------------------------------------------------------------------------------------|
| ENSG00000176407 | KCMF1     | 3,864457               | potassium channel modulatory factor 1 [Source:HGNC Symbol;Acc:HGNC:20589]                         |
| ENSG00000100532 | CGRRF1    | 3,749549               | cell growth regulator with ring finger domain 1 [Source:HGNC Symbol;Acc:HGNC:15528]               |
| ENSG00000073417 | PDE8A     | 3,608651               | phosphodiesterase 8A [Source:HGNC Symbol;Acc:HGNC:8793]                                           |
| ENSG00000135932 | CAB39     | 3,590708               | calcium binding protein 39 [Source:HGNC Symbol;Acc:HGNC:20292]                                    |
| ENSG00000250544 | LINC02059 | 3,46055                | long intergenic non-protein coding RNA 2059 [Source:HGNC Symbol;Acc:HGNC:52902]                   |
| ENSG00000008853 | RHOBTB2   | 3,453581               | Rho related BTB domain containing 2 [Source:HGNC Symbol;Acc:HGNC:18756]                           |
| ENSG00000138032 | PPM1B     | 3,419349               | protein phosphatase, Mg2+/Mn2+ dependent 1B [Source:HGNC Symbol;Acc:HGNC:9276]                    |
| ENSG00000176571 | CNBD1     | 3,372357               | cyclic nucleotide binding domain containing 1 [Source:HGNC Symbol;Acc:HGNC:26663]                 |
| ENSG00000008394 | MGST1     | -3,36091               | microsomal glutathione S-transferase 1 [Source:HGNC Symbol;Acc:HGNC:7061]                         |
| ENSG00000204634 | TBC1D8    | 3,300874               | TBC1 domain family member 8 [Source:HGNC Symbol;Acc:HGNC:17791]                                   |
| ENSG00000163788 | SNRK      | 3,293715               | SNF related kinase [Source:HGNC Symbol;Acc:HGNC:30598]                                            |
| ENSG00000008441 | NFIX      | -3,28952               | nuclear factor I X [Source:HGNC Symbol;Acc:HGNC:7788]                                             |
| ENSG00000234859 |           | -3,26935               |                                                                                                   |
| ENSG00000122042 | UBL3      | 3,255509               | ubiquitin like 3 [Source:HGNC Symbol;Acc:HGNC:12504]                                              |
| ENSG00000223414 | LINC00473 | 3,241392               | long intergenic non-protein coding RNA 473 [Source:HGNC Symbol;Acc:HGNC:21160]                    |
| ENSG00000173230 | GOLGB1    | -3,23783               | golgin B1 [Source:HGNC Symbol;Acc:HGNC:4429]                                                      |
| ENSG00000173041 | ZNF680    | -3,22329               | zinc finger protein 680 [Source:HGNC Symbol;Acc:HGNC:26897]                                       |
| ENSG00000132640 | BTBD3     | 3,214181               | BTB domain containing 3 [Source:HGNC Symbol;Acc:HGNC:15854]                                       |
| ENSG00000132326 | PER2      | 3,200003               | period circadian clock 2 [Source:HGNC Symbol;Acc:HGNC:8846]                                       |
| ENSG00000120910 | PPP3CC    | 3,191223               | protein phosphatase 3 catalytic subunit gamma [Source:HGNC Symbol;Acc:HGNC:9316]                  |
| ENSG00000135960 | EDAR      | -3,19091               | ectodysplasin A receptor [Source:HGNC Symbol;Acc:HGNC:2895]                                       |
| ENSG00000114302 | PRKAR2A   | 3,174658               | protein kinase cAMP-dependent type II regulatory subunit alpha [Source:HGNC Symbol;Acc:HGNC:9391] |
| ENSG00000107758 | PPP3CB    | 3,164928               | protein phosphatase 3 catalytic subunit beta [Source:HGNC Symbol;Acc:HGNC:9315]                   |
| ENSG00000198039 | ZNF273    | -3,12387               | zinc finger protein 273 [Source:HGNC Symbol;Acc:HGNC:13067]                                       |
| ENSG00000176273 | SLC35G1   | 3,120439               | solute carrier family 35 member G1 [Source:HGNC Symbol;Acc:HGNC:26607]                            |
| ENSG00000119986 | AVPI1     | 3,119359               | arginine vasopressin induced 1 [Source:HGNC Symbol;Acc:HGNC:30898]                                |
| ENSG00000065809 | FAM107B   | 3,104941               | family with sequence similarity 107 member B [Source:HGNC Symbol;Acc:HGNC:23726]                  |
| ENSG00000165914 | TTC7B     | 3,096498               | tetratricopeptide repeat domain 7B [Source:HGNC Symbol;Acc:HGNC:19858]                            |
| ENSG00000132359 | RAP1GAP2  | 3,080589               | RAP1 GTPase activating protein 2 [Source:HGNC Symbol;Acc:HGNC:29176]                              |
| ENSG00000198833 | UBE2J1    | 3,071382               | ubiquitin conjugating enzyme E2 J1 [Source:HGNC Symbol;Acc:HGNC:17598]                            |
| ENSG00000110514 | MADD      | 3,062192               | MAP kinase activating death domain [Source:HGNC Symbol;Acc:HGNC:6766]                             |

|                 |           |          |                                                                                                |
|-----------------|-----------|----------|------------------------------------------------------------------------------------------------|
| ENSG00000108788 | MLX       | 3,055069 | MLX, MAX dimerization protein [Source:HGNC Symbol;Acc:HGNC:11645]                              |
| ENSG00000133731 | IMPA1     | 3,041034 | inositol monophosphatase 1 [Source:HGNC Symbol;Acc:HGNC:6050]                                  |
| ENSG00000197442 | MAP3K5    | 3,03696  | mitogen-activated protein kinase kinase kinase 5 [Source:HGNC Symbol;Acc:HGNC:6857]            |
| ENSG00000172361 | CFAP53    | -3,02168 | cilia and flagella associated protein 53 [Source:HGNC Symbol;Acc:HGNC:26530]                   |
| ENSG00000106261 | ZKSCAN1   | -3,01616 | zinc finger with KRAB and SCAN domains 1 [Source:HGNC Symbol;Acc:HGNC:13101]                   |
| ENSG00000040933 | INPP4A    | 3,010244 | inositol polyphosphate-4-phosphatase type I A [Source:HGNC Symbol;Acc:HGNC:6074]               |
| ENSG00000070961 | ATP2B1    | 2,988601 | ATPase plasma membrane Ca <sup>2+</sup> transporting 1 [Source:HGNC Symbol;Acc:HGNC:814]       |
| ENSG00000110697 | PITPNM1   | 2,972496 | phosphatidylinositol transfer protein membrane associated 1 [Source:HGNC Symbol;Acc:HGNC:9003] |
| ENSG00000174839 | DENND6A   | 2,967336 | DENN domain containing 6A [Source:HGNC Symbol;Acc:HGNC:26635]                                  |
| ENSG00000129158 | SERGEF    | 2,961886 | secretion regulating guanine nucleotide exchange factor [Source:HGNC Symbol;Acc:HGNC:17499]    |
| ENSG00000198113 | TOR4A     | 2,961361 | torsin family 4 member A [Source:HGNC Symbol;Acc:HGNC:25981]                                   |
| ENSG00000256546 |           | -2,95933 |                                                                                                |
| ENSG00000138698 | RAP1GDS1  | 2,949026 | Rap1 GTPase-GDP dissociation stimulator 1 [Source:HGNC Symbol;Acc:HGNC:9859]                   |
| ENSG00000179094 | PER1      | 2,943918 | period circadian clock 1 [Source:HGNC Symbol;Acc:HGNC:8845]                                    |
| ENSG00000109756 | RAPGEF2   | 2,935232 | Rap guanine nucleotide exchange factor 2 [Source:HGNC Symbol;Acc:HGNC:16854]                   |
| ENSG00000162852 | CNST      | 2,934987 | consortin, connexin sorting protein [Source:HGNC Symbol;Acc:HGNC:26486]                        |
| ENSG00000130511 | SSBP4     | 2,930757 | single stranded DNA binding protein 4 [Source:HGNC Symbol;Acc:HGNC:15676]                      |
| ENSG00000027075 | PRKCH     | 2,918549 | protein kinase C eta [Source:HGNC Symbol;Acc:HGNC:9403]                                        |
| ENSG00000139289 | PHLDA1    | 2,912259 | pleckstrin homology like domain family A member 1 [Source:HGNC Symbol;Acc:HGNC:8933]           |
| ENSG00000114166 | KAT2B     | 2,904815 | lysine acetyltransferase 2B [Source:HGNC Symbol;Acc:HGNC:8638]                                 |
| ENSG00000258776 |           | -2,90312 |                                                                                                |
| ENSG00000175832 | ETV4      | 2,902654 | ETS variant 4 [Source:HGNC Symbol;Acc:HGNC:3493]                                               |
| ENSG00000118276 | B4GALT6   | 2,898231 | beta-1,4-galactosyltransferase 6 [Source:HGNC Symbol;Acc:HGNC:929]                             |
| ENSG00000164621 | SMAD5-AS1 | -2,89657 | SMAD5 antisense RNA 1 [Source:HGNC Symbol;Acc:HGNC:30586]                                      |
| ENSG00000244405 | ETV5      | 2,887049 | ETS variant 5 [Source:HGNC Symbol;Acc:HGNC:3494]                                               |
| ENSG00000187678 | SPRY4     | 2,886788 | sprouty RTK signaling antagonist 4 [Source:HGNC Symbol;Acc:HGNC:15533]                         |
| ENSG00000213047 | DENND1B   | 2,878624 | DENN domain containing 1B [Source:HGNC Symbol;Acc:HGNC:28404]                                  |
| ENSG00000197826 | C4orf22   | -2,874   | chromosome 4 open reading frame 22 [Source:HGNC Symbol;Acc:HGNC:28554]                         |
| ENSG00000145743 | FBXL17    | 2,860239 | F-box and leucine rich repeat protein 17 [Source:HGNC Symbol;Acc:HGNC:13615]                   |
| ENSG00000143952 | VPS54     | 2,853395 | VPS54, GARP complex subunit [Source:HGNC Symbol;Acc:HGNC:18652]                                |
| ENSG00000138101 | DTNB      | 2,842534 | dystrobrevin beta [Source:HGNC Symbol;Acc:HGNC:3058]                                           |
| ENSG00000213639 | PPP1CB    | 2,838167 | protein phosphatase 1 catalytic subunit beta [Source:HGNC Symbol;Acc:HGNC:9282]                |
| ENSG00000124151 | NCOA3     | 2,834192 | nuclear receptor coactivator 3 [Source:HGNC Symbol;Acc:HGNC:7670]                              |
| ENSG00000182224 | CYB5D1    | -2,83028 | cytochrome b5 domain containing 1 [Source:HGNC Symbol;Acc:HGNC:26516]                          |
| ENSG00000225539 | LINC01821 | -2,82904 | long intergenic non-protein coding RNA 1821 [Source:HGNC Symbol;Acc:HGNC:52626]                |
| ENSG00000160959 | LRRC14    | -2,82544 | leucine rich repeat containing 14 [Source:HGNC Symbol;Acc:HGNC:20419]                          |
| ENSG00000069956 | MAPK6     | 2,82137  | mitogen-activated protein kinase 6 [Source:HGNC Symbol;Acc:HGNC:6879]                          |



|                 |          |          |                                                                                         |
|-----------------|----------|----------|-----------------------------------------------------------------------------------------|
| ENSG00000236432 |          | -2,82008 |                                                                                         |
| ENSG00000171804 | WDR87    | -2,81123 | WD repeat domain 87 [Source:HGNC Symbol;Acc:HGNC:29934]                                 |
| ENSG00000132016 | C19orf57 | -2,81073 | chromosome 19 open reading frame 57 [Source:HGNC Symbol;Acc:HGNC:28153]                 |
| ENSG00000065802 | ASB1     | 2,808504 | ankyrin repeat and SOCS box containing 1 [Source:HGNC Symbol;Acc:HGNC:16011]            |
| ENSG00000156875 | MFSD14A  | 2,802228 | major facilitator superfamily domain containing 14A [Source:HGNC Symbol;Acc:HGNC:23363] |
| ENSG00000171530 | TBCA     | -2,79611 | tubulin folding cofactor A [Source:HGNC Symbol;Acc:HGNC:11579]                          |
| ENSG00000182500 | NA       | 2,795892 | NA                                                                                      |
| ENSG00000135002 | RFK      | 2,79467  | riboflavin kinase [Source:HGNC Symbol;Acc:HGNC:30324]                                   |
| ENSG00000196247 | ZNF107   | -2,78833 | zinc finger protein 107 [Source:HGNC Symbol;Acc:HGNC:12887]                             |
| ENSG00000174574 | AKIRIN1  | 2,787902 | akirin 1 [Source:HGNC Symbol;Acc:HGNC:25744]                                            |
| ENSG00000100605 | ITPK1    | 2,785637 | inositol-tetrakisphosphate 1-kinase [Source:HGNC Symbol;Acc:HGNC:6177]                  |
| ENSG00000196865 | NHLRC2   | 2,785384 | NHL repeat containing 2 [Source:HGNC Symbol;Acc:HGNC:24731]                             |
| ENSG00000198106 |          | -2,78275 |                                                                                         |
| ENSG00000198668 | CALM1    | 2,775872 | calmodulin 1 [Source:HGNC Symbol;Acc:HGNC:1442]                                         |
| ENSG00000169946 | ZFPM2    | -2,77344 | zinc finger protein, FOG family member 2 [Source:HGNC Symbol;Acc:HGNC:16700]            |
| ENSG00000158113 | LRRC43   | -2,76577 | leucine rich repeat containing 43 [Source:HGNC Symbol;Acc:HGNC:28562]                   |
| ENSG00000173334 | TRIB1    | 2,763587 | tribbles pseudokinase 1 [Source:HGNC Symbol;Acc:HGNC:16891]                             |
| ENSG00000175387 | SMAD2    | 2,757901 | SMAD family member 2 [Source:HGNC Symbol;Acc:HGNC:6768]                                 |
| ENSG00000107854 | TNKS2    | 2,753637 | tankyrase 2 [Source:HGNC Symbol;Acc:HGNC:15677]                                         |
| ENSG00000164253 | WDR41    | 2,75192  | WD repeat domain 41 [Source:HGNC Symbol;Acc:HGNC:25601]                                 |
| ENSG00000153310 | FAM49B   | 2,748118 | family with sequence similarity 49 member B [Source:HGNC Symbol;Acc:HGNC:25216]         |
| ENSG0000010810  | FYN      | 2,740599 | FYN proto-oncogene, Src family tyrosine kinase [Source:HGNC Symbol;Acc:HGNC:4037]       |
| ENSG00000106789 | CORO2A   | 2,737482 | coronin 2A [Source:HGNC Symbol;Acc:HGNC:2255]                                           |
| ENSG00000154822 | PLCL2    | 2,735062 | phospholipase C like 2 [Source:HGNC Symbol;Acc:HGNC:9064]                               |
| ENSG00000159346 | ADIPOR1  | 2,72892  | adiponectin receptor 1 [Source:HGNC Symbol;Acc:HGNC:24040]                              |
| ENSG00000165355 | FBXO33   | 2,726795 | F-box protein 33 [Source:HGNC Symbol;Acc:HGNC:19833]                                    |
| ENSG00000038427 | VCAN     | -2,72399 | versican [Source:HGNC Symbol;Acc:HGNC:2464]                                             |
| ENSG00000138134 | STAMBPL1 | 2,716632 | STAM binding protein like 1 [Source:HGNC Symbol;Acc:HGNC:24105]                         |
| ENSG00000109466 | KLHL2    | 2,712344 | kelch like family member 2 [Source:HGNC Symbol;Acc:HGNC:6353]                           |
| ENSG00000106803 | SEC61B   | -2,71048 | Sec61 translocon beta subunit [Source:HGNC Symbol;Acc:HGNC:16993]                       |
| ENSG00000067177 | PHKA1    | 2,710093 | phosphorylase kinase regulatory subunit alpha 1 [Source:HGNC Symbol;Acc:HGNC:8925]      |
| ENSG00000012232 | EXTL3    | 2,708249 | exostosin like glycosyltransferase 3 [Source:HGNC Symbol;Acc:HGNC:3518]                 |

**Biological theme:****Protein kinase binding****Gene sets:**

Kinase binding (GO)

Protein kinase binding (GO)

| Ensembl gene ID | Gene    | Weighted mean z -score | Description                                                                              |
|-----------------|---------|------------------------|------------------------------------------------------------------------------------------|
| ENSG00000077044 | DGKD    | 4,182944               | diacylglycerol kinase delta [Source:HGNC Symbol;Acc:HGNC:2851]                           |
| ENSG00000171206 | TRIM8   | 4,173677               | tripartite motif containing 8 [Source:HGNC Symbol;Acc:HGNC:15579]                        |
| ENSG00000186591 | UBE2H   | 4,130638               | ubiquitin conjugating enzyme E2 H [Source:HGNC Symbol;Acc:HGNC:12484]                    |
| ENSG00000110422 | HIPK3   | 4,000689               | homeodomain interacting protein kinase 3 [Source:HGNC Symbol;Acc:HGNC:4915]              |
| ENSG00000072062 | PRKACA  | 3,97212                | protein kinase cAMP-activated catalytic subunit alpha [Source:HGNC Symbol;Acc:HGNC:9380] |
| ENSG00000076928 | ARHGEF1 | 3,879147               | Rho guanine nucleotide exchange factor 1 [Source:HGNC Symbol;Acc:HGNC:681]               |
| ENSG00000182957 | SPATA13 | 3,82123                | spermatogenesis associated 13 [Source:HGNC Symbol;Acc:HGNC:23222]                        |
| ENSG00000081320 | STK17B  | 3,755434               | serine/threonine kinase 17b [Source:HGNC Symbol;Acc:HGNC:11396]                          |
| ENSG00000099875 | MKNK2   | 3,622718               | MAP kinase interacting serine/threonine kinase 2 [Source:HGNC Symbol;Acc:HGNC:7111]      |
| ENSG00000141582 | CBX4    | 3,621299               | chromobox 4 [Source:HGNC Symbol;Acc:HGNC:1554]                                           |
| ENSG00000136490 | LIMD2   | 3,572124               | LIM domain containing 2 [Source:HGNC Symbol;Acc:HGNC:28142]                              |
| ENSG00000063245 | EPN1    | 3,57207                | epsin 1 [Source:HGNC Symbol;Acc:HGNC:21604]                                              |
| ENSG00000129355 | CDKN2D  | 3,567217               | cyclin dependent kinase inhibitor 2D [Source:HGNC Symbol;Acc:HGNC:1790]                  |
| ENSG00000153179 | RASSF3  | 3,56435                | Ras association domain family member 3 [Source:HGNC Symbol;Acc:HGNC:14271]               |
| ENSG00000116604 | MEF2D   | 3,563115               | myocyte enhancer factor 2D [Source:HGNC Symbol;Acc:HGNC:6997]                            |
| ENSG00000141298 | SSH2    | 3,519703               | slingshot protein phosphatase 2 [Source:HGNC Symbol;Acc:HGNC:30580]                      |
| ENSG00000177666 | PNPLA2  | 3,505861               | patatin like phospholipase domain containing 2 [Source:HGNC Symbol;Acc:HGNC:30802]       |
| ENSG00000185236 | RAB11B  | 3,476148               | RAB11B, member RAS oncogene family [Source:HGNC Symbol;Acc:HGNC:9761]                    |
| ENSG00000175215 | CTDSP2  | 3,470724               | CTD small phosphatase 2 [Source:HGNC Symbol;Acc:HGNC:17077]                              |
| ENSG00000086062 | B4GALT1 | 3,465897               | beta-1,4-galactosyltransferase 1 [Source:HGNC Symbol;Acc:HGNC:924]                       |
| ENSG00000132819 | RBM38   | 3,456865               | RNA binding motif protein 38 [Source:HGNC Symbol;Acc:HGNC:15818]                         |
| ENSG00000152601 | MBNL1   | 3,439108               | muscleblind like splicing regulator 1 [Source:HGNC Symbol;Acc:HGNC:6923]                 |
| ENSG00000144579 | CTDSP1  | 3,436199               | CTD small phosphatase 1 [Source:HGNC Symbol;Acc:HGNC:21614]                              |
| ENSG00000110075 | PPP6R3  | 3,427792               | protein phosphatase 6 regulatory subunit 3 [Source:HGNC Symbol;Acc:HGNC:1173]            |
| ENSG00000104915 | STX10   | 3,414787               | syntaxin 10 [Source:HGNC Symbol;Acc:HGNC:11428]                                          |
| ENSG00000137185 | ZSCAN9  | -3,40946               | zinc finger and SCAN domain containing 9 [Source:HGNC Symbol;Acc:HGNC:12984]             |
| ENSG00000157933 | SKI     | 3,376692               | SKI proto-oncogene [Source:HGNC Symbol;Acc:HGNC:10896]                                   |
| ENSG00000078369 | GNB1    | 3,365732               | G protein subunit beta 1 [Source:HGNC Symbol;Acc:HGNC:4396]                              |
| ENSG00000133818 | RRAS2   | 3,354027               | related RAS viral (r-ras) oncogene homolog 2 [Source:HGNC Symbol;Acc:HGNC:17271]         |
| ENSG00000175115 | PACS1   | 3,34959                | phosphofurin acidic cluster sorting protein 1 [Source:HGNC Symbol;Acc:HGNC:30032]        |
| ENSG00000184640 | SEPT9   | 3,344101               | septin 9 [Source:HGNC Symbol;Acc:HGNC:7323]                                              |
| ENSG00000127663 | KDM4B   | 3,282037               | lysine demethylase 4B [Source:HGNC Symbol;Acc:HGNC:29136]                                |
| ENSG00000159840 | ZYX     | 3,277177               | zyxin [Source:HGNC Symbol;Acc:HGNC:13200]                                                |
| ENSG00000112658 | SRF     | 3,251479               | serum response factor [Source:HGNC Symbol;Acc:HGNC:11291]                                |
| ENSG00000153487 | ING1    | 3,246105               | inhibitor of growth family member 1 [Source:HGNC Symbol;Acc:HGNC:6062]                   |

|                 |          |          |                                                                                                   |
|-----------------|----------|----------|---------------------------------------------------------------------------------------------------|
| ENSG00000168488 | ATXN2L   | 3,230865 | ataxin 2 like [Source:HGNC Symbol;Acc:HGNC:31326]                                                 |
| ENSG00000173120 | KDM2A    | 3,225902 | lysine demethylase 2A [Source:HGNC Symbol;Acc:HGNC:13606]                                         |
| ENSG00000171843 | MLLT3    | 3,218543 | MLLT3, super elongation complex subunit [Source:HGNC Symbol;Acc:HGNC:7136]                        |
| ENSG00000141522 | ARHGDI1A | 3,215317 | Rho GDP dissociation inhibitor alpha [Source:HGNC Symbol;Acc:HGNC:678]                            |
| ENSG00000173757 | STAT5B   | 3,195358 | signal transducer and activator of transcription 5B [Source:HGNC Symbol;Acc:HGNC:11367]           |
| ENSG00000134954 | ETS1     | 3,166743 | ETS proto-oncogene 1, transcription factor [Source:HGNC Symbol;Acc:HGNC:3488]                     |
| ENSG00000145349 | CAMK2D   | 3,161391 | calcium/calmodulin dependent protein kinase II delta [Source:HGNC Symbol;Acc:HGNC:1462]           |
| ENSG00000103495 | MAZ      | 3,161383 | MYC associated zinc finger protein [Source:HGNC Symbol;Acc:HGNC:6914]                             |
| ENSG00000171988 | JMJD1C   | 3,151277 | jumonji domain containing 1C [Source:HGNC Symbol;Acc:HGNC:12313]                                  |
| ENSG00000123143 | PKN1     | 3,148454 | protein kinase N1 [Source:HGNC Symbol;Acc:HGNC:9405]                                              |
| ENSG00000136827 | TOR1A    | -3,1354  | torsin family 1 member A [Source:HGNC Symbol;Acc:HGNC:3098]                                       |
| ENSG00000139974 | SLC38A6  | -3,12454 | solute carrier family 38 member 6 [Source:HGNC Symbol;Acc:HGNC:19863]                             |
| ENSG00000125817 | CENPB    | 3,120376 | centromere protein B [Source:HGNC Symbol;Acc:HGNC:1852]                                           |
| ENSG00000138443 | ABI2     | 3,120034 | abl interactor 2 [Source:HGNC Symbol;Acc:HGNC:24011]                                              |
| ENSG00000159335 | PTMS     | 3,104089 | parathymosin [Source:HGNC Symbol;Acc:HGNC:9629]                                                   |
| ENSG00000173442 | EHBP1L1  | 3,100877 | EH domain binding protein 1 like 1 [Source:HGNC Symbol;Acc:HGNC:30682]                            |
| ENSG00000143753 | DEGS1    | -3,10007 | delta 4-desaturase, sphingolipid 1 [Source:HGNC Symbol;Acc:HGNC:13709]                            |
| ENSG00000123353 | ORMDL2   | -3,09818 | ORMDL sphingolipid biosynthesis regulator 2 [Source:HGNC Symbol;Acc:HGNC:16037]                   |
| ENSG00000135766 | EGLN1    | 3,091759 | egl-9 family hypoxia inducible factor 1 [Source:HGNC Symbol;Acc:HGNC:1232]                        |
| ENSG00000177169 | ULK1     | 3,091604 | unc-51 like autophagy activating kinase 1 [Source:HGNC Symbol;Acc:HGNC:12558]                     |
| ENSG00000162889 | MAPKAPK2 | 3,075222 | mitogen-activated protein kinase-activated protein kinase 2 [Source:HGNC Symbol;Acc:HGNC:6887]    |
| ENSG00000126458 | RRAS     | 3,070637 | related RAS viral (r-ras) oncogene homolog [Source:HGNC Symbol;Acc:HGNC:10447]                    |
| ENSG00000196588 | MKL1     | 3,068135 | megakaryoblastic leukemia (translocation) 1 [Source:HGNC Symbol;Acc:HGNC:14334]                   |
| ENSG00000105723 | GSK3A    | 3,057546 | glycogen synthase kinase 3 alpha [Source:HGNC Symbol;Acc:HGNC:4616]                               |
| ENSG00000196961 | AP2A1    | 3,054822 | adaptor related protein complex 2 alpha 1 subunit [Source:HGNC Symbol;Acc:HGNC:561]               |
| ENSG00000198408 | MGEA5    | 3,054431 | meningioma expressed antigen 5 (hyaluronidase) [Source:HGNC Symbol;Acc:HGNC:7056]                 |
| ENSG00000177663 | IL17RA   | 3,044475 | interleukin 17 receptor A [Source:HGNC Symbol;Acc:HGNC:5985]                                      |
| ENSG00000155897 | ADCY8    | -3,01478 | adenylate cyclase 8 [Source:HGNC Symbol;Acc:HGNC:239]                                             |
| ENSG00000047617 | ANO2     | -3,00797 | anoctamin 2 [Source:HGNC Symbol;Acc:HGNC:1183]                                                    |
| ENSG00000160741 | CRTC2    | 3,005593 | CREB regulated transcription coactivator 2 [Source:HGNC Symbol;Acc:HGNC:27301]                    |
| ENSG00000064666 | CNN2     | 2,993099 | calponin 2 [Source:HGNC Symbol;Acc:HGNC:2156]                                                     |
| ENSG00000005483 | KMT2E    | 2,988177 | lysine methyltransferase 2E [Source:HGNC Symbol;Acc:HGNC:18541]                                   |
| ENSG00000215790 | SLC35E2  | 2,977497 | solute carrier family 35 member E2 [Source:HGNC Symbol;Acc:HGNC:20863]                            |
| ENSG00000155324 | GRAMD3   | 2,976258 | GRAM domain containing 3 [Source:HGNC Symbol;Acc:HGNC:24911]                                      |
| ENSG00000153561 | RMND5A   | 2,973602 | required for meiotic nuclear division 5 homolog A [Source:HGNC Symbol;Acc:HGNC:25850]             |
| ENSG00000146700 | SSC4D    | 2,971428 | scavenger receptor cysteine rich family member with 4 domains [Source:HGNC Symbol;Acc:HGNC:14461] |
| ENSG00000142599 | RERE     | 2,968883 | arginine-glutamic acid dipeptide repeats [Source:HGNC Symbol;Acc:HGNC:9965]                       |
| ENSG00000184922 | FMNL1    | 2,968801 | formin like 1 [Source:HGNC Symbol;Acc:HGNC:1212]                                                  |
| ENSG00000253250 | C8orf88  | 2,956469 | chromosome 8 open reading frame 88 [Source:HGNC Symbol;Acc:HGNC:44672]                            |
| ENSG00000116514 | RNF19B   | 2,952826 | ring finger protein 19B [Source:HGNC Symbol;Acc:HGNC:26886]                                       |

|                 |          |          |                                                                                                                |
|-----------------|----------|----------|----------------------------------------------------------------------------------------------------------------|
| ENSG00000162620 | LRRIQ3   | -2,95114 | leucine rich repeats and IQ motif containing 3 [Source:HGNC Symbol;Acc:HGNC:28318]                             |
| ENSG00000103126 | AXIN1    | 2,950765 | axin 1 [Source:HGNC Symbol;Acc:HGNC:903]                                                                       |
| ENSG00000228106 |          | -2,94891 |                                                                                                                |
| ENSG00000132471 | WBP2     | 2,944219 | WW domain binding protein 2 [Source:HGNC Symbol;Acc:HGNC:12738]                                                |
| ENSG00000171148 | TADA3    | 2,930497 | transcriptional adaptor 3 [Source:HGNC Symbol;Acc:HGNC:19422]                                                  |
| ENSG00000180448 | ARHGAP45 | 2,92551  | Rho GTPase activating protein 45 [Source:HGNC Symbol;Acc:HGNC:17102]                                           |
| ENSG00000198909 | MAP3K3   | 2,924523 | mitogen-activated protein kinase kinase kinase 3 [Source:HGNC Symbol;Acc:HGNC:6855]                            |
| ENSG00000002834 | LASP1    | 2,918575 | LIM and SH3 protein 1 [Source:HGNC Symbol;Acc:HGNC:6513]                                                       |
| ENSG00000154229 | PRKCA    | 2,908846 | protein kinase C alpha [Source:HGNC Symbol;Acc:HGNC:9393]                                                      |
| ENSG00000167566 | NCKAP5L  | 2,907165 | NCK associated protein 5 like [Source:HGNC Symbol;Acc:HGNC:29321]                                              |
| ENSG00000113384 | GOLPH3   | 2,901079 | golgi phosphoprotein 3 [Source:HGNC Symbol;Acc:HGNC:15452]                                                     |
| ENSG00000138764 | CCNG2    | 2,89792  | cyclin G2 [Source:HGNC Symbol;Acc:HGNC:1593]                                                                   |
| ENSG00000158195 | WASF2    | 2,895007 | WAS protein family member 2 [Source:HGNC Symbol;Acc:HGNC:12733]                                                |
| ENSG00000185652 | NTF3     | -2,89021 | neurotrophin 3 [Source:HGNC Symbol;Acc:HGNC:8023]                                                              |
| ENSG00000131504 | DIAPH1   | 2,888454 | diaphanous related formin 1 [Source:HGNC Symbol;Acc:HGNC:2876]                                                 |
| ENSG00000153048 | CARHSP1  | 2,886378 | calcium regulated heat stable protein 1 [Source:HGNC Symbol;Acc:HGNC:17150]                                    |
| ENSG00000006062 | MAP3K14  | 2,881767 | mitogen-activated protein kinase kinase kinase 14 [Source:HGNC Symbol;Acc:HGNC:6853]                           |
| ENSG00000170891 | CYTL1    | -2,86633 | cytokine like 1 [Source:HGNC Symbol;Acc:HGNC:24435]                                                            |
| ENSG00000133816 | MICAL2   | 2,864662 | microtubule associated monooxygenase, calponin and LIM domain containing 2 [Source:HGNC Symbol;Acc:HGNC:24693] |
| ENSG00000247746 | USP51    | -2,86454 | ubiquitin specific peptidase 51 [Source:HGNC Symbol;Acc:HGNC:23086]                                            |
| ENSG00000139722 | VPS37B   | 2,860594 | VPS37B, ESCRT-I subunit [Source:HGNC Symbol;Acc:HGNC:25754]                                                    |
| ENSG00000198890 | PRMT6    | -2,85845 | protein arginine methyltransferase 6 [Source:HGNC Symbol;Acc:HGNC:18241]                                       |
| ENSG00000141232 | TOB1     | 2,858099 | transducer of ERBB2, 1 [Source:HGNC Symbol;Acc:HGNC:11979]                                                     |
| ENSG00000166501 | PRKCB    | 2,857352 | protein kinase C beta [Source:HGNC Symbol;Acc:HGNC:9395]                                                       |
| ENSG00000143437 | ARNT     | 2,854103 | aryl hydrocarbon receptor nuclear translocator [Source:HGNC Symbol;Acc:HGNC:700]                               |
